# Supplementary material for: In situ cosmogenic 10 Be– 14 C– 26 Al measurements from recently deglaciated bedrock as a new tool to decipher changes in Greenland Ice Sheet size
Source: Copernicus journal article supplement (doi:10.5194/cp-17-419-2021), 2021-02-17
Supplement: Supplementary file 1 [file cp-17-419-2021-supplement.zip]

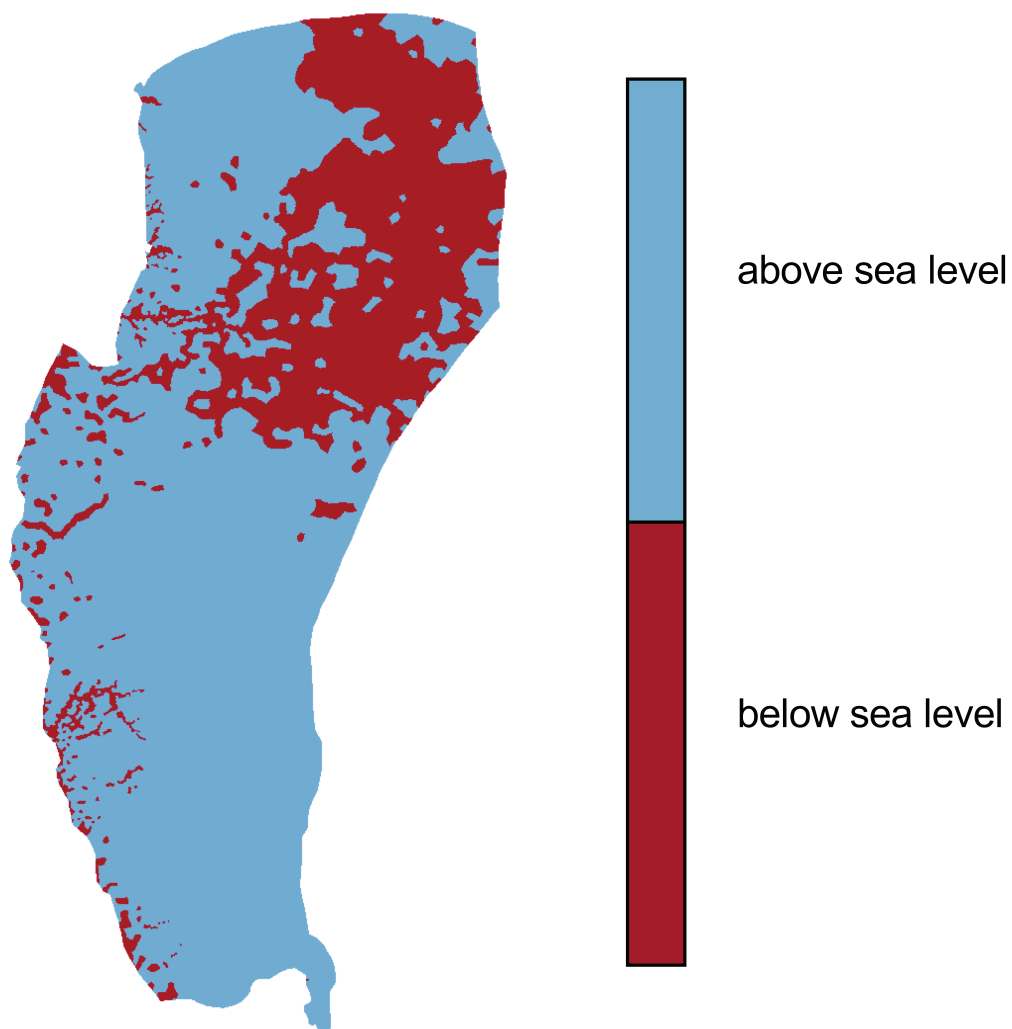

Figure S1: Portions of the model domain above (blue) and below (red) sea level. Note that throughout the model simulations, relative sea level varies, which will influence which portions of the model domain are land or marine terminating.
