# Supplementary material for: In situ cosmogenic 10 Be– 14 C– 26 Al measurements from recently deglaciated bedrock as a new tool to decipher changes in Greenland Ice Sheet size
Source: Copernicus journal article supplement (doi:10.5194/cp-17-419-2021), 2021-02-17
Supplement: Supplementary file 1 [file Tables_KNS_Young.xlsx]

## Sheet: Table_S1
Table S1. Radiocarbon sample information for Figure 1.
Latitude (N)	Longitude (W)	Material Dated	Radiocarbon Age (14C yr BP)	Radiocarbon age uncertainty (yr)	Calibrated Age (cal yr BP)	Calibrated ageuncertainty (2σ; yr)	Lab Number	Reference
64.3	52.0667	Marine bivalve	9860	140	11240	460	I-8565	Weidick, 1976
64.22	51.95	Marine bivalve	9460	140	10680	420	I-8493	Weidick, 1976
64.33	51.88	Marine bivalve	9230	135	10360	410	I-8566	Weidick, 1976
64.12	51.7	Marine bivalve	9355	140	10580	420	I-8490	Weidick, 1976
64.47	51.68	Gyttja	9000	140	10090	420	K-2292	Fredskild, 1983
64.4	51.6833	Gyttja	8960	190	10020	480	K-2750	Fredskild, 1983
64.27	52.67	Marne bivalve	8855	130	9850	350	I-8509	Weidick, 1976
64.75	51.05	Marine bivalve	8794	41	9280	170	UBA-15882	Larsen et al., 2014
64.79	51.01	Marine bivalve	8525	31	8940	190	UBA-16276	Larsen et al., 2014
64.58	50.8	Marine bivalve	8250	130	9090	360	I-8598	Weidick, 1976
64.77	50.58	Marine bivalve	8740	185	9840	410	K-2749	Fredskild, 1983
64.33	50.4	Marine bivalve	8785	120	9790	330	I-7665	Weidick, 1975
64.33	50.4	Marine bivalve	8810	120	9810	330	I-7666	Weidick, 1975
64.3	50.18	Humic acid	8797	48	9850	290	UBA-17023	Larsen et al., 2014; Kap01
64.3	50.18	Aquatic macrofossil	8450	160	9450	440	OS-138097	This study*; Kap01
64.4	50.2	Humic acid	9326	40	10520	140	UBA-17089	Larsen et al., 2014
64.28	50.11	Marine bivalve	9490	105	10170	340	Ua-3476	Weidick, 1972; Weidick et al., 2012
64.01	49.61	Aquatic macrofossil	7903	38	8790	190	UBA-17738	Larsen et al., 2014
63.9881	49.5107	Aquatic macrofossil	8210	40	9210	190	OS-138406	Lesnek et al., 2020; Deception Lake
64.75	50.15	Marine bivalve	7200	110	7890	260	I-8599	Weidick, 1976
64.7647	49.588	Aquatic macrofossil	6560	45	7460	110	OS-138287	Lesnek et al., 2020; Caribou Lake
65.0589	50.3822	Aquatic macrofossil	4975	32	5730	130	AAR-23014	Levy et al., 2017
65.2968	50.2556	Terrestrial macrofossil	4666	48	5440	130	AAR-23032	Levy et al., 2017
65.2869	50.2406	Terrestrial macrofossil	4058	42	4610	190	AAR-23004	Levy et al., 2017
65.2764	50.2288	Terrestrial macrofossil	5127	45	5870	120	AAR-23017	Levy et al., 2017
Radiocarbon ages for terrestrial samples and are calibrated using CALIB 8.2 and the INTCAL20 dataset (Stuiver et al., 2020; Reimer et al., 2020).
Marine samples are calibrated using CALIB 8.2 and the MARINE20 database (𝛥R=0; R = 550 years; Heaton et al., 2020). We added 400 years to older marine samples (I-samples) because they were originally
reported with an assumed 𝝳13C value of -25 per mille instead of 0 per mille.
*See Table S7 for sample details; this sample is from the same lake as sample UBA-17023 (Larsen et al., 2014).

## Sheet: Table_S2
Table S2. 10Be sample information for Figure 1.
Sample ID	Latitude (N)	Longitude (W)	Elevation (m asl)	Pressure flag	Sample thickness (cm)	Density	Shielding	Erosion	10Be concentration (atoms g-1)	10Be conc. uncertainty	Be standard	Age ka BP (Lm)	Age unc.	Sample type	Reference
NU-1-10	64.178	51.674	126	std	2.6	2.65	0.995	0	51500	5400	07KNSTD	10.5482	1.11527	Boulder	Winsor et al., 2015
NU-3-10	64.178	51.673	144	std	1.9	2.65	0.996	0	58500	9200	07KNSTD	11.6879	1.85296	Boulder	Winsor et al., 2015
NU-7-2008	64.178	51.672	146	std	1.5	2.65	0.997	0	48500	5300	07KNSTD	9.6151	1.05962	Boulder	Winsor et al., 2015
NU-2-10	64.178	51.672	149	std	2	2.65	0.997	0	74600	12800	07KNSTD	14.8536	2.56812	Boulder	Winsor et al., 2015
NU-5-2008	64.182	51.657	333	std	2	2.65	0.998	0	59900	5200	07KNSTD	9.85295	0.862517	Boulder	Winsor et al., 2015
NU-4-2008	64.183	51.657	334	std	1.5	2.65	0.998	0	58100	3800	07KNSTD	9.50597	0.627024	Boulder	Winsor et al., 2015
NU-1-2008	64.187	51.646	419	std	2.5	2.65	1	0	71500	6000	07KNSTD	10.8474	0.917633	Boulder	Winsor et al., 2015
NU-2-2008	64.186	51.646	422	std	2	2.65	1	0	70400	6600	07KNSTD	10.6046	1.00228	Boulder	Winsor et al., 2015
NU-4-10	64.187	51.645	427	std	2.7	2.65	1	0	75300	16900	07KNSTD	11.3568	2.56967	Boulder	Winsor et al., 2015
NU-5-10	64.187	51.645	427	std	3.8	2.65	1	0	63200	9400	07KNSTD	9.60408	1.44	Boulder	Winsor et al., 2015
											Mean (n=9)	10.35 ± 0.81 (0.83)
BUK0876	64.356	49.2981	1303	std	8	2.65	1	0	235617	6846.54	07KNSTD	17.22	0.504882	Boulder	Larsen et al., 2014
BUK0879	64.3547	49.2941	1263	std	6	2.65	0.9996	0	127926	14106.4	07KNSTD	9.47	1.05421	Boulder	Larsen et al., 2014
BUK0881	64.3244	49.574	760	std	6	2.65	1	0	113230	14268	07KNSTD	12.94	1.64488	Boulder	Larsen et al., 2014
BUK0883	64.1489	50.6039	816	std	2	2.65	0.9998	0	94366.1	2747.97	07KNSTD	9.89	0.290637	Bedrock	Larsen et al., 2014
BUK0884	64.1487	50.6034	817	std	12	2.65	0.9998	0	91399.7	9959.38	07KNSTD	10.38	1.14228	Boulder	Larsen et al., 2014
BUK0885	64.1495	50.6015	817	std	10	2.65	0.9998	0	105446	18666.5	07KNSTD	11.8	2.10817	Boulder	Larsen et al., 2014
											Mean (n=3)	10.63 ± 0.99 (1.01)
BUK0871	64.0478	49.5806	1212	std	8	2.65	1	0	157453	11760.9	07KNSTD	12.36	0.931996	Boulder	Larsen et al., 2014
BUK0873	64.0477	49.582	1210	std	10	2.65	1	0	335158	11729.3	07KNSTD	26.94	0.952872	Bedrock	Larsen et al., 2014
BUK0874	64.0456	49.5783	1179	std	10	2.65	0.9998	0	121766	4468.62	07KNSTD	9.97	0.36971	Boulder	Larsen et al., 2014
BUK0875	64.0456	49.5783	1179	std	8	2.65	0.9998	0	124633	5037.28	07KNSTD	10.05	0.40998	Boulder	Larsen et al., 2014
											Mean (n=2)	9.95 ± 0.06 (0.19)
BUK0816	63.9361	50.4359	1187	std	6	2.65	0.999	0	121710	11716.3	07KNSTD	9.58	0.9307	Boulder	Larsen et al., 2014
BUK0818	63.9361	50.4359	1187	std	5	2.65	0.999	0	278459	6505.97	07KNSTD	21.87	0.515511	Boulder	Larsen et al., 2014
BUK0814	63.9411	50.4407	1101	std	4	2.65	0.9996	0	110949	3687.99	07KNSTD	9.23312	0.309626	Boulder	Larsen et al., 2014
BUK0815	63.9411	50.4407	1101	std	1	2.65	0.9996	0	360531	8632.23	07KNSTD	29.52	0.713671	Bedrock	Larsen et al., 2014
											Mean (n=2)	9.35 ± 0.25 (0.30)
BUK0805	63.8169	51.4063	360	std	1	2.65	0.9999	0	87722.9	2836.35	07KNSTD	13.9447	0.454345	Bedrock	Larsen et al., 2014
BUK0802	63.8261	51.3957	250	std	2	2.65	0.9998	0	61707.8	3095.2	07KNSTD	11.0133	0.556927	Bedrock	Larsen et al., 2014
BUK0803	63.8262	51.3958	250	std	3	2.65	0.9998	0	57744.1	2795.28	07KNSTD	10.38	0.506957	Boulder	Larsen et al., 2014
BUK0804	63.8273	51.3942	220	std	2	2.65	0.9994	0	73119.4	3782.27	07KNSTD	13.4803	0.702732	Bedrock	Larsen et al., 2014
BUK0801	63.828	51.3958	182	std	3.5	2.65	0.9936	0	55141.4	3322.11	07KNSTD	10.7443	0.652672	Boulder	Larsen et al., 2014
											Mean (n=3)	10.65 ± 0.32 (0.37)
BUK0806	63.2333	51.1211	110	std	4	2.65	0.9742	0	39749.9	4490.43	07KNSTD	8.52424	0.971725	Boulder	Larsen et al., 2014
BUK0807	63.854	51.1215	105	std	1.5	2.65	0.9742	0	46547.5	2905.72	07KNSTD	9.85824	0.620735	Boulder	Larsen et al., 2014
BUK0809	63.8532	51.1219	82	std	2	2.65	0.9742	0	43858	2596.98	07KNSTD	9.55757	0.570864	Bedrock	Larsen et al., 2014
BUK0811	63.8535	51.1224	80	std	4	2.65	0.9742	0	43932.5	3754.31	07KNSTD	9.75	0.840778	Bedrock	Larsen et al., 2014
											Mean (n=4)	9.36 ± 0.61 (0.64)
Ages are calculated using version 3 of the exposure age calculator found at https://hess.ess.washington.edu/ (wrapper: 3.0, muons: 1A, consts: 3.0.3), which implements an updated treatment of muon-based production (Balco et al., 2008; Balco, 2017). All ages are calculated using 'Lm' scaling and a
Baffin Bay production rate of 4.04 ± 0.07 atoms g-1 yr-1 (Young et al., 2013), and reported relative to ka BP (CE 1950). This value has been updated from the CRONUS v2 value of 3.96 ± 0.07 atoms g-1 yr-1; the calibration dataset is the same. All samples use a density of 2.65 g cm-3, standard air pressure
'std', and an effective attenuation length of 160 g cm-2. 10Be concentrations are reported relative to 07KNSTD with a reported ratio of 2.85 x 10-12 using a 10Be half-life of 1.387 x 106 years (Nishiizumi et al., 2007; Chmeleff et al., 2010). Numbers in parentheses are the age uncertainties that include the
uncertainty in the 10Be production-rate calibration dataset.

## Sheet: Table_S3
Table S3. 10Be sample information
Sample	Latitude	Longitude	Elevation (m asl)	Thickness (cm)	Shielding	Quartz (g)	Carrier added (g)a	10Be/9Be ratiob	± 1σ Uncertainty	Blank-corrected 10Be concentration (atoms g-1)c	Blank-corrected 10Be conc. uncertainty (atoms g-1)c	Age ka BP (Lm)	Age ka BP uncertainty	Age ka relative to year of sample collection (CE 2017)	Age ka uncertainty	AMS Facility
Deglacial erratics (Fig. 1)
Caribou Lake
17GRO-01	64.7514	-49.5612	748	1.5	1	30.0636	0.2208	1.47972e-13	4.73195e-15	77994	2754.9	8.663	0.307621	8.73	0.31	PRIME
17GRO-02	64.7528	-49.5514	726	2	1	30.6487	0.2182	1.4906e-13	4.80625e-15	76160.1	2708.41	8.663	0.307621	8.73	0.31	PRIME
17GRO-04	64.7781	-49.5466	856	2	1	29.8967	0.2188	1.70522e-13	5.44881e-15	89562.9	3161.51	9.073	0.317654	9.14	0.32	PRIME
												Mean ± 1 S.D. (n=3)	8.80 ± 0.24 (0.29)
Deception Lake
17GRO-49	63.9764	-49.5159	931	2.5	1	30.8008	0.2199	2.18442e-13	5.96286e-15	111924	3486.1	10.663	0.337877	10.73	0.34	PRIME
17GRO-51	63.9755	-49.5141	928	3	1	28.7113	0.2133	1.86451e-13	5.54343e-15	99409.2	3310.42	9.523	0.317764	9.59	0.32	PRIME
One-way Lake
17GRO-53	63.9156	-49.6995	900	3	1	30.9295	0.2207	3.25538e-13	8.38632e-15	166707	4969.59	16.433	0.48801	16.5	0.49	PRIME
17GRO-54	63.9054	-49.6797	885	2	1	30.9295	0.2207	1.56836e-13	4.72461e-15	78459.5	2640.35	7.723	0.257764	7.79	0.26	PRIME
Qamanarsuup Sermia
Outboard erratics
17GRO-46	64.456	-49.4553	769	1.3	1	28.0742	0.1944	1.9777e-13	4.91e-15	94977.5	2772	10.343	0.308005	10.41	0.31	PRIME
17GRO-47	64.4561	-49.4556	763	2.04	1	30.1333	0.2017	1.9794e-13	4.75e-15	91901	2617	10.123	0.288093	10.19	0.29	PRIME
17GRO-48	64.4557	-49.4556	767	2.94	1	28.3832	0.2009	1.9139e-13	5.05e-15	93952.7	2869	10.393	0.31795	10.46	0.32	PRIME
												Mean ± 1 S.D. (n=3)	10.29 ± 0.14 (0.23)
Moraine boulders
17GRO-15	64.4583	-49.4441	751	3.02	1	19.7464	0.2003	1.4011e-13	4.68e-15	98439.9	3634	11.013	0.406555	11.08	0.409028	PRIME
17GRO-16	64.4585	-49.444	753	1.28	1	35.0774	0.2031	2.1211e-13	5.43e-15	84197.9	2508	9.403	0.280087	9.47	0.282083	PRIME
17GRO-17	64.4594	-49.4395	783	1.39	1	22.828	0.1996	1.4656e-13	5.03e-15	88777.3	3350	9.513	0.358972	9.58	0.3615	PRIME
17GRO-18	64.4587	-49.4332	767	1.2	1	20.7362	0.1816	1.45752e-13	3.6438e-15	87519	2562	9.653	0.282578	9.72	0.28454	LLNL-CAMS
17GRO-19	64.459	-49.4352	771	3.14	1	35.0537	0.2026	3.293e-13	6.31e-15	130625	3187	14.633	0.357018	14.7	0.358653	PRIME
17GRO-20	64.4587	-49.4322	769	3.2	1	35.1117	0.2027	2.6302e-13	6.03e-15	104161	2863	11.673	0.320849	11.74	0.322691	PRIME
17GRO-28	64.4622	-49.4288	811	2.48	1	40.0369	0.2036	5.4682e-13	8.94e-15	191011	4242	20.343	0.45178	20.41	0.453268	PRIME
17GRO-29	64.4642	-49.4261	817	1.19	1	38.427	0.2036	2.4708e-13	6.31e-15	89844.1	2666	9.363	0.277834	9.43	0.279822	PRIME
17GRO-31	64.4651	-49.424	822	1.76	1	28.0196	0.1823	3.57706e-13	6.58778e-15	159706	3802	16.723	0.398112	16.79	0.399707	LLNL-CAMS
17GRO-32	64.4657	-49.423	823	2.18	1	39.7783	0.2033	2.5143e-13	6.46e-15	88192.2	2629	9.213	0.274639	9.28	0.276636	PRIME
17GRO-34	64.4651	-49.4329	835	2.13	1	35.0552	0.2018	2.2624e-13	5.78e-15	89303.9	2656	9.333	0.277574	9.4	0.279567	PRIME
17GRO-35	64.468	-49.4347	835	1.02	1	8.7955	0.1825	6.67282e-14	1.66821e-15	94602	2792	9.803	0.289317	9.87	0.291294	LLNL-CAMS
17GRO-36	64.468	-49.4349	868	1.11	1	18.668	0.1815	1.43053e-13	3.57633e-15	95356	2792	9.603	0.281173	9.67	0.283135	LLNL-CAMS
17GRO-37	64.4671	-49.437	867	2.8	1	39.403	0.2034	2.8144e-13	9.21e-15	99724.9	3596	10.073	0.363224	10.14	0.36564	PRIME
17GRO-38	64.4669	-49.4378	861	1.4	1	15.7109	0.1827	1.11897e-13	1.82286e-15	88883	1985	8.913	0.199052	8.98	0.200548	LLNL-CAMS
17GRO-39	64.4652	-49.4412	810	1.28	1	10.0196	0.1838	7.32285e-14	1.47601e-15	91435	2328	9.593	0.244245	9.66	0.24595	LLNL-CAMS
17GRO-40	64.4625	-49.4423	769	2.2	1	41.8017	0.2038	2.5932e-13	6.52e-15	86774.2	2545	9.513	0.279007	9.58	0.280972	PRIME
17GRO-41	64.4629	-49.4479	759	1.37	1	41.2628	0.2037	2.5931e-13	6.28e-15	87860.9	2508	9.653	0.275546	9.72	0.277459	PRIME
17GRO-42	64.4624	-49.4512	757	2.71	0.999	40.0588	0.2035	2.6083e-13	6.11e-15	90943.4	2535	10.133	0.282452	10.2	0.28432	PRIME
17GRO-44	64.4608	-49.4462	767	2.85	0.999	32.6832	0.204	2.1244e-13	6.29e-15	90978.5	3027	10.063	0.334812	10.13	0.337041	PRIME
17GRO-45	64.4608	-49.4461	766	2.56	0.999	39.6378	0.2042	2.3707e-13	6.11e-15	83811.9	2505	9.243	0.276258	9.31	0.278261	PRIME
												Mean ± 1 S.D. (n=16)	9.57 ± 0.33 (0.38)
Inboard erratics
17GRO-25	64.4696	-49.429	839	1.52	1	35.129	0.1985	2.2934e-13	5.42e-15	89925.3	2530	9.213	0.258123	9.28	0.26	PRIME
17GRO-26	64.4694	-49.432	857	1.61	1	30.0347	0.2002	2.0042e-13	4.72e-15	92665.2	2603	9.353	0.26808	9.42	0.27	PRIME
17GRO-27	64.47	-49.4385	824	2.12	1	23.8896	0.2004	1.5356e-13	4.29e-15	89260.5	2853	9.313	0.297857	9.38	0.3	PRIME
												Mean ± 1 S.D. (n=3)	9.29 ± 0.07 (0.18)
Kangiata Nunaata Sermia
Deglacial landscape
17GRO-05	64.2865	-49.4883	790	1.71	1	25.1512	0.181	1.86693e-13	3.36048e-15	93272	2192	9.99637	0.235518	10.0634	0.237097	LLNL-CAMS
17GRO-06	64.2865	-49.4883	790	2.32	1	25.7869	0.18	1.96967e-13	3.5454e-15	95460	2243	10.2843	0.242274	10.3513	0.243852	LLNL-CAMS
17GRO-07	64.2866	-49.4879	788	1.6	1	7.0405	0.181	6.76978e-14	2.81267e-15	119635	5326	12.86	0.574364	12.927	0.577357	LLNL-CAMS
17GRO-61	64.2896	-49.8001	660	2.9	1	25.0166	0.2024	1.678e-13	4.258e-15	93965.7	2778	11.4397	0.339177	11.5067	0.341164	PRIME
17GRO-69	64.2924	-49.7999	685	1.49	1	25.049	0.2024	1.6944e-13	4.38e-15	94763	2841	11.1463	0.335105	11.2133	0.337119	PRIME
17GRO-70	64.2915	-49.7957	655	5.12	1	5.3244	0.1816	4.1336e-14	1.3512e-15	82228.1	3354.43	10.233	0.417268	10.3	0.42	LLNL-CAMS
Kapisigdlit stade moraine
17GRO-56	64.295	-49.7813	774	1.87	1	10.6138	0.1832	7.83402e-14	3.03924e-15	93336.3	3904	10.1567	0.425914	10.2237	0.428724	LLNL-CAMS
17GRO-58	64.2942	-49.7929	693	2.79	1	13.6518	0.184	1.02039e-13	2.73942e-15	95095	2932	11.2234	0.347021	11.2904	0.349092	LLNL-CAMS
17GRO-59	64.2948	-49.7957	694	2.22	1	30.3514	0.203	1.93602e-13	5.92e-15	89530.1	3061	10.5022	0.360015	10.5692	0.362312	PRIME
17GRO-62	64.2933	-49.8075	626	3.12	0.991	30.1856	0.2033	9.20211e-14	3.59e-15	42741.7	1803	5.38246	0.22736	5.44946	0.23019	PRIME
17GRO-63	64.2942	-49.8033	669	3.04	1	12.4228	0.1831	5.50572e-14	1.18019e-15	56001	1474	6.73421	0.177552	6.80121	0.179319	LLNL-CAMS
17GRO-64	64.2942	-49.8026	671	1.89	1	30.188	0.2038	1.44273e-13	4.89e-15	87604.6	3264.1	10.463	0.387519	10.53	0.39	PRIME
17GRO-66	64.2946	-49.7998	683	3.29	1	30.2354	0.2032	1.77292e-13	4.26e-15	82365.8	2345	9.83829	0.280795	9.90529	0.282708	PRIME
												Mean ± 1 S.D. (n=4)	10.24 ± 0.31 (0.36)
Inboard erratics
17GRO-67	64.2975	-49.8028	662	2.42	1	25.0681	0.2029	1.5131e-13	4.01e-15	84749.6	2590	10.2493	0.314032	10.3163	0.316084	PRIME
17GRO-68	64.2974	-49.8036	660	2.94	1	25.9659	0.2015	1.5715e-13	3.78e-15	84396	2401	10.2685	0.292888	10.3355	0.294799	PRIME
Inboard of historical limit
17GRO-08	64.2865	-49.4832	769	2.04	1	31.2019	0.1785	4.01303e-13	8.88032e-15	158742	4249	17.4601	0.469402	17.5271	0.471203	LLNL-CAMS
17GRO-09	64.2832	-49.479	772	1.77	1	10.8469	0.1795	1.37291e-13	2.84573e-15	156733	4026	17.153	0.44251	17.22	0.444238	LLNL-CAMS
17GRO-10	64.2805	-49.4704	675	1.19	1	46.137	0.1785	4.08052e-13	7.53882e-15	109163	2601	12.9486	0.309529	13.0156	0.31113	LLNL-CAMS
17GRO-11	64.281	-49.4634	638	1.48	0.993	15.0238	0.1799	9.74278e-14	1.8696e-15	80568.8	1972	9.95576	0.244288	10.0228	0.245932	LLNL-CAMS
17GRO-12	64.2809	-49.4574	591	1.36	0.993	15.0822	0.1817	2.21108e-13	3.54996e-15	184334	4058	23.9312	0.530003	23.9982	0.531487	LLNL-CAMS
17GRO-13	64.2809	-49.4563	600	1.68	0.993	15.0463	0.1818	1.41083e-13	3.05178e-15	117860	3111	15.1583	0.401639	15.2253	0.403414	LLNL-CAMS
17GRO-14	64.2809	-49.4569	599	1.17	0.993	51.2658	0.1808	6.32796e-13	8.19631e-15	154381	3062	19.8334	0.395338	19.9004	0.396674	LLNL-CAMS
17GRO-71	64.2819	-49.4566	600	0.88	1	25.2632	0.1794	1.101e-13	2.04786e-15	54215.2	1302	6.82901	0.164285	6.89601	0.165897	LLNL-CAMS
17GRO-72	64.2226	-49.5875	461	2.89	1	25.059	0.1826	9.45901e-14	1.6493e-15	47598.4	1100	6.93981	0.160662	7.00681	0.162213	LLNL-CAMS
17GRO-73	64.2222	-49.5895	458	1.67	1	25.065	0.1811	9.31058e-14	1.69453e-15	46618.1	1106	6.74679	0.160339	6.81379	0.161931	LLNL-CAMS
17GRO-74	64.2247	-49.5857	483	1.32	1	25.4747	0.182	9.37151e-14	1.48798e-15	46234	1015	6.51335	0.143227	6.58035	0.1447	LLNL-CAMS
17GRO-75	64.2248	-49.5879	481	3.7	1	25.088	0.1826	9.07144e-14	3.3972e-15	45588.2	1847	6.56047	0.266238	6.62747	0.268957	LLNL-CAMS
a Samples were spiked with LDEO carriers 6 or 7 with evaporation-corrected 9Be concentrations ranging from 1028 to 1042 ppm, or a Buffalo carrier with a concentration of 1074 ppm (see Table S4).
b Ratios are not corrected for 10Be detected in procedural blanks.
c Concentrations are blank corrected by subtracting the total number of 10Be atoms in the process blank; see Table S4 for process blank values.
Sample thickness is a weighted average of nuemerous thickness measurements on individual rock fragments (typically >10) using digital calipers.
Ages are calculated using version 3 of the exposure age calculator found at https://hess.ess.washington.edu/ (wrapper: 3.0, muons: 1A, consts: 3.0.3), which implements an updated treatment of muon-based production (Balco et al., 2008; Balco, 2017). All ages are calculated using 'Lm'
scaling and a Baffin Bay production rate of 4.04 ± 0.07 atoms g-1 yr-1 (Young et al., 2013a). This value has been updated from the CRONUS v2 value of 3.96 ± 0.07 atoms g-1 yr-1; the calibration dataset is the same. All samples use a density of 2.65 g cm-3, standard air pressure 'std', and
an effective attenuation length of 160 g cm-2. 10Be concentrations are reported relative to 07KNSTD with a reported ratio of 2.85 x 10-12 using a 10Be half-life of 1.387 x 106 years (Nishiizumi et al., 2007; Chemeleff et al., 2010). Numbers in parentheses are the moraine age uncertainties
that include the uncertainty in the 10Be production-rate calibration dataset. Moraine ages with the production rate uncertainty must be used when comparing the Baffin Bay moraines to any independent record that is not on the Baffin Bay-Arctic 10Be timescale.

## Sheet: Table_S4
Table S4. 10Be data process blank
Sample ID	Carrier added (g)	Carrier concentration	10Be/9Be ratio ± 1σ (10-16)	10Be atoms	Samples applied to (Tables S3):
LDEO Carrier 6
BLK2_2018Apr13	0.1791	1035.7	4.830 ± 1.157	5990 ± 1437	17GRO-07, -08, -09, -10, -14
BLK1_2018May14	0.203	1036.8	4.500 ± 3.500	6331 ± 4925	17GRO-59, -62, -64, -66,
BLK1_2018May14	0.1832	1036.8	2.320 ± 0.698	2942 ± 1031	17GRO-58, -63
BLK2_2018May31	0.1817	1036.9	3.450 ± 1.090	4350 ± 1376	17GRO-11, -12, -13, -72, -74, -75
BLK_2018Jul6	0.2028	1037.4	3.100 ± 2.400	4359 ± 3376	17GRO-61, -67, -68, -69
BLK_2018Jul23	0.1827	1037.6	3.740 ± 1.322	4738 ± 1677	17GRO-56
BLK1_2019Jan28	0.1791	1041.2	4.700 ± 1.600	5869 ± 1956	17GRO-06, -06
BLK2_2019Jan28	0.1801	1041.2	4.000 ± 1.200	5016 ± 1514	17GRO-71, -73
BLK3_2019Jan28	0.2	1041.2	6.700 ± 4.200	9326 ± 5848	17GRO-15, -17, -25, -26, -27, -46, -47, -48
LDEO Carrier 7
BLK1_2019Mar13	0.1828	1028.3	21.010 ± 2.314	26399 ± 2935
BLK2_2019Mar13	0.183	1028.3	6.700 ± 4.200	15106 ± 2234
			Mean ± 1 S.D. (n=2)	20753 ± 7985	17GRO-70
BLK1_2019Apr15	0.2022	1028.8	6.500 ± 2.700	9038 ± 3757	17GRO-16, -19, -20, -34
BLK2_2019Apr15	0.1825	1028.8	4.290 ± 2.100	5378 ± 2636	17GRO-18, -35, -36
BLK_2019Sep13	0.204	1028.4	4.000 ± 2.000	5609 ± 2806	17GRO-28, -29, -32, -37, -40, -41, -42, -44, -45
BLK_2019Oct7	0.1835	1028.8	7.470 ± 1.465	9430 ± 1854	17GRO-31, -38, -39
Buffalo Carrier
99_Blank	0.2176	1074	13.660 ± 2.540	21332 ± 3979	17GRO-01, -02, -04, -49, -51, -53, -54
All 10Be concentrations are reported relative to 07KNSTD with a reported ratio of 2.85 x 10-12 using a 10Be half-life of 1.387 x 106 years (Nishiizumi et al., 2007; Chemeleff et al., 2010).

## Sheet: Table_S5
Table S5. 26Al sample information
Sample	Quartz(g)	26Al/27Al ratio	26Al/27Al ratio uncertainty	Total 27Al (mg)	26Al conecentration (atoms g-1)	26Al uncertainty (atoms g-1)	10Be concentration (atoms g-1); From Table S3	10Be conc. uncertainty (atoms g-1); From Table S3	26Al/10Be	26Al/10Be unc.
17GRO-08	15.0285	4.57635e-13	1.62773e-14	1.5709 ± 0.0014	1.06524e+06	38005.6	158742	4249	6.71051	0.24 (0.48)
17GRO-09	34.6949	1.01221e-12	1.935e-14	1.7359 ± 0.0035	1.12843e+06	21620.2	156733	4026	7.19969	0.14 (0.28)
17GRO-10	15.1387	3.31351e-13	1.11212e-14	1.5616 ± 0.0014	760447	25647.3	109163	2601	6.96616	0.23 (0.46)
17GRO-11	15.0238	2.65063e-13	1.17915e-14	1.5191 ± 0.0104	595722	26652.3	80568.8	1972	7.39395	0.33 (0.66)
17GRO-12	15.0822	5.05707e-13	1.57485e-14	1.6578 ± 0.0016	1.23825e+06	38665.9	184334	4058	6.71741	0.21 (0.42)
17GRO-13	15.0463	3.08666e-13	1.28812e-14	1.5534 ± 0.0050	708831	29720.7	117860	3111	6.0142	0.25 (0.50)
17GRO-14	15.0234	4.73651e-13	1.35386e-14	1.5177 ± 0.0041	1.06556e+06	30563.7	154381	3062	6.90213	0.20 (0.40)
17GRO-71	25.2632	3.2964e-13	1.467e-14	1.3700 ± 0.0021	398413	17757.2	54215.2	1302	7.34873	0.33 (0.66)
17GRO-72	25.059	2.46857e-13	9.3836e-15	1.5168 ± 0.0048	332019	12708	47598.4	1100	6.97544	0.27 (0.54)
17GRO-73	25.065	2.6232e-13	1.322e-14	1.3941 ± 0.0021	325062	16412.3	46618.1	1106	6.97287	0.35 (0.70)
17GRO-74	25.4747	2.47831e-13	9.74313e-15	1.5592 ± 0.0021	337103	13338.5	46234	1015	7.29125	0.29 (0.58)
17GRO-75	25.088	2.22564e-13	9.93188e-15	1.6241 ± 0.0025	320105	14378	45588.2	1847	7.02166	0.32 (0.64)
Process blanks					Blank atoms	Atoms uncertainty	Samples applied to
BLK2_2018May13	NA	1.09487e-15	6.4322e-16	1.5327 ± 0.0027	37456	22005	17GRO-08, -10, -11, -12, -13, -14, -72, -74, -75
BLK2_2019Jan28	NA	3.9e-16	3.9e-16	1.7337 ± 0.0026	15092	15092	17GRO-71, -73
BLK_2019Jun19	NA	1.76e-15	5.9e-16	1.7616 ± 0.0025	69204	23199	17GRO-09
All samples were measured at PRIME.
Aluminum extraction for samples 17GRO-08, -09, -10, and -14 was completed independently of the beryllium extraction and therefore have different quartz weights than what is listed in Table S3.
We report the 1-sigma ratio uncertainty; 2-sigma uncertainty is in parentheses.

## Sheet: Table S6
Table S6a. In situ 14C sample extraction details
Sample	Quartz (g)	Carbon yield (𝝁gC)	Carbon yield unc. (𝝁g C)	Diluted carbon mass (𝝁g C)	Diluted carbon mass unc. (𝝁g C)	Fm	Fm unc.	𝛅13C (‰)	14C/Ctotal	14C/Ctotal_unc	14C concentration (atoms/g)	14C concentration unc. (atoms/g)	Blank correction applied (#of atoms)	Blank correction unc. (#of atoms)	Age ka BP (Lm)	Age ka BP unc.	Age ka (Lm)	Age ka unc.	Measurement facility
17GRO-08	5.1644	21.75	0.25	21.75	0.25	0.8535	0.01	-26.8	9.75425e-13	1.14285e-14	189794	8544.11	81094	6972	10.113	0.894077	10.18	0.9	CEREGE
17GRO-09	5.1392	21.37	0.25	21.37	0.25	0.8246	0.0108	-27.9	9.40278e-13	1.23151e-14	184202	8127.13	81094	6972	9.463	0.784446	9.53	0.79	CEREGE
17GRO-10	5.1049	20.59	0.24	20.59	0.24	0.8169	0.0084	-27.5	9.32261e-13	9.58623e-15	172735	7513.47	81094	6972	9.703	0.804445	9.77	0.81	CEREGE
17GRO-11	5.1287	53.13	0.61	53.13	0.61	0.3009	0.00832	-15.3	3.52014e-13	9.73333e-15	166922	8716.14	81094	6972	9.803	0.98328	9.87	0.99	CEREGE
17GRO-12	5.0083	49.15	0.56	49.15	0.56	0.250987	0.00315247	-14.9	2.93833e-13	3.69063e-15	128534	5885.8	81094	6972	6.683	0.475236	6.75	0.48	CEREGE
17GRO-13	5.1844	48.25	0.55	48.25	0.55	0.2603	0.0038	-14.6	3.04948e-13	4.4518e-15	125901	5872.24	85768	12070	6.493	0.455302	6.56	0.46	CEREGE
17GRO-14	4.9156	57.24	0.66	789.71	9.04	0.0182	0.0002	-17.7	1.84192e-14	3.98521e-16	124587	9593.83	116894	37306.9	6.293	0.732204	6.36	0.74	LLNL-CAMS
17GRO-71	5.1134	40.36	0.46	40.36	0.46	0.3236	0.0037	-16.5	3.77653e-13	4.31804e-15	134483	6084.14	81094	6972	6.993	0.495255	7.06	0.5	CEREGE
17GRO-72	5.0072	25.52	0.29	57.09	0.7	0.1879	0.0026	-14.6	2.2013e-13	3.04597e-15	109666	5146.64	81094	6972	6.273	0.445244	6.34	0.45	CEREGE
17GRO-73	5.106	40.58	0.47	65.31	0.75	0.171574	0.00247705	-14.1	2.01187e-13	2.90457e-15	113122	5254.1	81094	6972	6.523	0.465222	6.59	0.47	CEREGE
17GRO-74	4.0181	51.69	0.59	794.46	9.1	0.0140057	0.000204602	-17.7	1.35248e-14	3.99203e-16	105002	10923.4	116894	37306.9	5.623	0.839991	5.69	0.85	LLNL-CAMS
17GRO-75	4.9974	25.9	0.3	56.03	0.64	0.1935	0.0028896	-22.1	2.2327e-13	3.33416e-15	109215	5122.45	81094	6972	6.123	0.425346	6.19	0.43	CEREGE
14C concentration uncertainty includes the raw measurement uncertainty and a 3.6% uncertainty propagated through to reflect the LDEO scatter in CRONUS-A measurements (updated from Lamp et al., 2019).
17GRO-14 and 17GRO-71 use an assumed 𝛅13C value of -17.7. Due to the large dilution factor, the 𝛅13C signal is dominated by the 𝛅13C of the dilution gas (Lamp et al., 2019).
Table S6b. In situ 14C blank extraction details
BLANK_11_28_17	NA	7.61	0.08	28.64	0.33	0.0442012	0.00164576	-24.728	5.07419e-14	1.88929e-15	72762	2834.69
BLANK_11-1-18	NA	8.84	0.09	30.32	0.35	0.0443	0.0024	-19.1	5.14345e-14	2.78652e-15	78139.2	4303.39
BLANK_5_13_19	NA	7.76	0.09	24.14	0.28	0.0616	0.0015	-25.3	7.06157e-14	1.71954e-15	85327.7	2333.54
BLANK_6_11_19	NA	9.22	0.11	25.52	0.29	0.1192	0.002	-25	1.3673e-13	2.29412e-15	174813	3582.3
BLANK_9_10_19	NA	10.68	0.12	24.57	0.28	0.0631	0.0016	-31.2	7.14669e-14	1.81216e-15	88147.8	2480.19
BLANK_3_2_20	NA	8.34	0.09	24	0.3	0.0752	0.0017	-21.8	8.68125e-14	1.96252e-15	104464	2698.52
BLANK_11_28_17 was originally reported in Lamp et al (2019). All measurements were made at CEREGE.
Table S6c. In situ 14C CRONUS-A extraction details - CEREGE
CRONUSA_8_28_17	3.6111	27.14	0.31	45.11	0.52	0.936608	0.00734786	-20.7	1.08408e-12	8.50482e-15	656388	9621.72
CRONUSA_5_13_19	3.5869	30.27	0.35	50.02	0.59	0.8503	0.0064	-19.5	9.86321e-13	7.42379e-15	666743	9956.36
CRONUSA_6_13_19	3.6944	30.27	0.35	30.27	0.35	1.4549	0.0064	-22.7	1.6767e-12	7.37568e-15	667536	7704.74
CRONUSA_9_12_19	3.5044	28.84	0.33	28.84	0.33	1.4084	0.0115	-21.1	1.6284e-12	1.32964e-14	647843	9100.93
CRONUSA_1_30_20	3.5527	29.12	0.24	50	0.6	0.8565	0.0075	-22.8	9.86752e-13	8.64056e-15	672150	10887.2
									Mean ± 1 S.D. (n=5)		662132	9848.92
CRONUSA_8_2_17 was originally reported in Lamp et al, 2019. All measurements were made at CEREGE.

## Sheet: Table S7
Table S7. Traditional 14C sample information for lakes in the KNS region
Lake Name	Core ID	Latitude (°N)	Longitide (°W)	Composite Depth (cm)	Lab number	Material dated	Fraction modern	𝛅13C (‰)	Radiocarbon Age (14C yr BP)	Radiocarbon age uncertainty (yr)	Calibrated Age (cal yr BP)	Calibrated age uncertainty (2σ; yr)
Kap01	17KAP-A4	64.3082	50.1885	197.0-198.0	OS-138397	Aquatic macrofossils	0.3493	-26.7	8450	160	9450	440
Goose Feather Lake	17GOOF-A3	64.4532	49.4437	79.0-80.0	OS-141199	Aquatic macrofossils	0.8948	-25.7	895	20	820	90
	17GOOF-A4	64.4532	49.4437	198.5-199.5	OS-141260	Sediment organic carbon	0.3945	-23.8	7470	35	8280	90
Marshall Lake	17MAR-A2	64.4636	49.4331	8	OS-141261	Aquatic macrofossils	0.9402	-18.8	495	20	520	20
	17MAR-C1	64.4636	49.4331	16.5-17.0	OS-144352	Aquatic macrofossils	0.8804	-22.5	1020	20	940	20
	17MAR-C1	64.4636	49.4331	48.0-49.0	OS-144353	Aquatic macrofossils	0.6541	-25.9	3410	20	3690	120
	17MAR-C1	64.4636	49.4331	83.5-84.0	OS-144354	Aquatic macrofossils	0.455	-27.4	6330	30	7240	80
	17MAR-C1	64.4636	49.4331	104.5-105.5	OS-137548	Aquatic macrofossils	0.377	-27.3	7840	150	8720	360
Radiocarbon ages are calibrated using CALIB 8.2 and the INTCAL20 dataset (Stuiver et al., 2020; Reimer et al., 2020).
All samples were measured at the National Ocean Sciences Accelerator Mass Spectrometry Facility (NOSAMS) at Woods Hole Oceanographic Institution.
Radiocarbon ages from Goose Feather Lake were previously reported in Lesnek et al (2020).

## Sheet: Table S8
Table S8. 14C/10Be ratios
Sample	14C concentration (atoms/g); from Table S6a	14C concentration unc. (atoms/g); from Table S6a	10Be concentration (atoms g-1); from Table S3	10Be conc. uncertainty (atoms g-1); from Table S3	14C/10Be	14C/10Be unc.	Minimum sample-specifi detectable burial (yrs)
17GRO-08	189794	8544.11	158742	4249	NA	NA	NA
17GRO-09	184202	8127.13	156733	4026	NA	NA	NA
17GRO-10	172735	7513.47	109163	2601	NA	NA	NA
17GRO-11	166922	8716.14	80568.8	1972	2.0718	0.11 (0.22)	510
17GRO-12	128534	5885.8	184334	4058	NA	NA	NA
17GRO-13	125901	5872.24	117860	3111	NA	NA	NA
17GRO-14	124587	9593.83	154381	3062	NA	NA	NA
17GRO-71	134483	6084.14	54215.2	1302	2.48054	0.11 (0.22)	520
17GRO-72	109666	5146.64	47598.4	1100	2.30398	0.11 (0.22)	515
17GRO-73	113122	5254.1	46618.1	1106	2.42657	0.11 (0.22)	515
17GRO-74	105002	10923.4	46234	1015	2.2711	0.24 (0.48)	1150
17GRO-75	109215	5122.45	45588.2	1847	2.39569	0.11 (0.22)	510
Ratios are not reported for samples that have inherited Be-10, which results in artificially low ratios.
We report the 1-sigma ratio uncertainty; 2-sigma uncertainty is in parentheses.
Minimum detectable burial is calculated using the sample-specific 1-sigma ratio uncertainty. Using the average ratio precision of all measurements (5.7%),
we calculate a minimum burial detection limit of 625 years.

## Sheet: Table S9
Table S9. Modeled erosion depths
Sample	Measured 10Be concentration (atoms g-1)	Measured 10Be conc. unc. (atoms g-1)	Measured 14C concentration (atoms g-1)	Measured 14C conc. unc. (atoms g-1)	Years of historical ice cover	10 ka total erosion depth-10Be (cm)	10 ka total erosion depth-14C (cm)	9 ka total erosion depth-10Be (cm)	9 ka total erosion depth-14C (cm)	8 ka total erosion depth-10Be (cm)	8 ka total erosion depth-14C (cm)	7.5 ka total erosion depth-10Be (cm)	7.5 ka total erosion depth-14C (cm)
17GRO-71	54215	1392	134483	6084	275	23.1 ± 0.9	14.4 ± 3.3	16.7 ± 1.1	10.4 ± 3.1	9.5 ± 1.1	5.7 ± 3.1	5.6 ± 1.1	3.0 ± 3.0
17GRO-72	47598	1199	109666	5147	245	23.2 ± 1.1	20.6 ± 3.4	16.7 ± 1.0	16.5 ± 3.4	9.5 ± 1.1	11.7 ± 3.4	5.6 ± 1.1	8.9 ± 3.3
17GRO-73	46618	1106	113122	5254	245	24.3 ± 1.2	18.1 ± 3.4	17.8 ± 1.2	14.1 ± 3.4	10.6 ± 1.2	9.3 ± 3.4	6.6 ± 1.2	6.6 ± 3.3
17GRO-74	46234	1015	105002	10923	245	26.2 ± 1.0	25.1 ± 8.1	19.8 ± 1.0	21.0 ± 8.1	12.6 ± 1.0	16.0 ± 8.1	8.7 ± 1.0	13.3 ± 7.9
17GRO-75	45588	1847	109215	5122	245	27.0 ± 2.3	22.1 ± 3.4	20.6 ± 2.3	18.0 ± 3.4	13.3 ± 2.3	13.2 ± 3.4	9.4 ± 2.3	10.3 ± 3.5
					Mean ± 1 S.D.	24.8 ± 1.8	20.1 ± 4.1	18.3 ± 1.8	16.0 ± 4.0	11.1 ± 1.8	11.2 ± 3.9	7.2 ± 1.8	8.4 ± 3.9
