# Supplementary material for: In situ cosmogenic 10 Be– 14 C– 26 Al measurements from recently deglaciated bedrock as a new tool to decipher changes in Greenland Ice Sheet size
Source: Copernicus journal article supplement (doi:10.5194/cp-17-419-2021), 2021-02-17
Supplement: Supplementary file 2 [file cp-17-419-2021-supplement.zip]

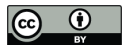

## *Supplement of*

# **In situ cosmogenic $^{10}\text{Be}$ – $^{14}\text{C}$ – $^{26}\text{Al}$ measurements from recently deglaciated bedrock as a new tool to decipher changes in Greenland Ice Sheet size**

Nicolás E. Young et al.

*Correspondence to:* Nicolás E. Young (nicolasy@ldeo.columbia.edu)

- cp-17-419-2021-supplement-title-page.pdf
- Figure\_S1.pdf
- Tables\_KNS\_Young.xlsx
- Tables\_S1\_S9.pdf
- \_\_MACOSX
  - .\_Figure\_S1.pdf
  - .\_Tables\_KNS\_Young.xlsx
  - .\_Tables\_S1\_S9.pdf

The copyright of individual parts of the supplement might differ from the CC BY 4.0 License.
