# Supplementary material for: In situ cosmogenic 10 Be– 14 C– 26 Al measurements from recently deglaciated bedrock as a new tool to decipher changes in Greenland Ice Sheet size
Source: Copernicus journal article supplement (doi:10.5194/cp-17-419-2021), 2021-02-17
Supplement: Supplementary file 5 [file cp-17-419-2021-supplement.zip]

**Table S1. Radiocarbon sample information for Figure 1.**

| Latitude (N) | Longitude (W) | Material Dated          | Radiocarbon Age<br>( <sup>14</sup> C yr BP) | Radiocarbon age<br>uncertainty (yr) | Calibrated Age (cal yr BP) | Calibrated<br>ageuncertainty (2σ; yr) | Lab Number | Reference                           |
|--------------|---------------|-------------------------|---------------------------------------------|-------------------------------------|----------------------------|---------------------------------------|------------|-------------------------------------|
| 64.3000      | 52.0667       | Marine bivalve          | 9860                                        | 140                                 | 11240                      | 460                                   | I-8565     | Weidick, 1976                       |
| 64.2200      | 51.9500       | Marine bivalve          | 9460                                        | 140                                 | 10680                      | 420                                   | I-8493     | Weidick, 1976                       |
| 64.3300      | 51.8800       | Marine bivalve          | 9230                                        | 135                                 | 10360                      | 410                                   | I-8566     | Weidick, 1976                       |
| 64.1200      | 51.7000       | Marine bivalve          | 9355                                        | 140                                 | 10580                      | 420                                   | I-8490     | Weidick, 1976                       |
| 64.4700      | 51.6800       | Gyttja                  | 9000                                        | 140                                 | 10090                      | 420                                   | K-2292     | Fredskild, 1983                     |
| 64.4000      | 51.6833       | Gyttja                  | 8960                                        | 190                                 | 10020                      | 480                                   | K-2750     | Fredskild, 1983                     |
| 64.2700      | 52.6700       | Marne bivalve           | 8855                                        | 130                                 | 9850                       | 350                                   | I-8509     | Weidick, 1976                       |
| 64.7500      | 51.0500       | Marine bivalve          | 8794                                        | 41                                  | 9280                       | 170                                   | UBA-15882  | Larsen et al., 2014                 |
| 64.7900      | 51.0100       | Marine bivalve          | 8525                                        | 31                                  | 8940                       | 190                                   | UBA-16276  | Larsen et al., 2014                 |
| 64.5800      | 50.8000       | Marine bivalve          | 8250                                        | 130                                 | 9090                       | 360                                   | I-8598     | Weidick, 1976                       |
| 64.7700      | 50.5800       | Marine bivalve          | 8740                                        | 185                                 | 9840                       | 410                                   | K-2749     | Fredskild, 1983                     |
| 64.3300      | 50.4000       | Marine bivalve          | 8785                                        | 120                                 | 9790                       | 330                                   | I-7665     | Weidick, 1975                       |
| 64.3300      | 50.4000       | Marine bivalve          | 8810                                        | 120                                 | 9810                       | 330                                   | I-7666     | Weidick, 1975                       |
| 64.3000      | 50.1800       | Humic acid              | 8797                                        | 48                                  | 9850                       | 290                                   | UBA-17023  | Larsen et al., 2014; Kap01          |
| 64.3000      | 50.1800       | Aquatic macrofossil     | 8450                                        | 160                                 | 9450                       | 440                                   | OS-138097  | This study*; Kap01                  |
| 64.4000      | 50.2000       | Humic acid              | 9326                                        | 40                                  | 10520                      | 140                                   | UBA-17089  | Larsen et al., 2014                 |
| 64.2800      | 50.1100       | Marine bivalve          | 9490                                        | 105                                 | 10170                      | 340                                   | Ua-3476    | Weidick, 1972; Weidick et al., 2012 |
| 64.0100      | 49.6100       | Aquatic macrofossil     | 7903                                        | 38                                  | 8790                       | 190                                   | UBA-17738  | Larsen et al., 2014                 |
| 63.9881      | 49.5107       | Aquatic macrofossil     | 8210                                        | 40                                  | 9210                       | 190                                   | OS-138406  | Lesnek et al., 2020; Deception Lake |
| 64.7500      | 50.1500       | Marine bivalve          | 7200                                        | 110                                 | 7890                       | 260                                   | I-8599     | Weidick, 1976                       |
| 64.7647      | 49.5880       | Aquatic macrofossil     | 6560                                        | 45                                  | 7460                       | 110                                   | OS-138287  | Lesnek et al., 2020; Caribou Lake   |
| 65.0589      | 50.3822       | Aquatic macrofossil     | 4975                                        | 32                                  | 5730                       | 130                                   | AAR-23014  | Levy et al., 2017                   |
| 65.2968      | 50.2556       | Terrestrial macrofossil | 4666                                        | 48                                  | 5440                       | 130                                   | AAR-23032  | Levy et al., 2017                   |
| 65.2869      | 50.2406       | Terrestrial macrofossil | 4058                                        | 42                                  | 4610                       | 190                                   | AAR-23004  | Levy et al., 2017                   |
| 65.2764      | 50.2288       | Terrestrial macrofossil | 5127                                        | 45                                  | 5870                       | 120                                   | AAR-23017  | Levy et al., 2017                   |

Radiocarbon ages for terrestrial samples and are calibrated using CALIB 8.2 and the INTCAL20 dataset (Stuiver et al., 2020; Reimer et al., 2020).

Marine samples are calibrated using CALIB 8.2 and the MARINE20 database (ΔR=0; R = 550 years; Heaton et al., 2020). We added 400 years to older marine samples (I-samples) because they were originally reported with an assumed δ13C value of -25 per mille instead of 0 per mille.

\*See Table S7 for sample details; this sample is from the same lake as sample UBA-17023 (Larsen et al., 2014).

Table S2. <sup>10</sup>Be sample information for Figure 1.

| Sample ID                             | Latitude (N) | Longitude (W) | Elevation (m asl) | Pressure flag | Sample thickness (cm) | Density | Shielding | Erosion | <sup>10</sup> Be concentration (atoms g <sup>-1</sup> ) | <sup>10</sup> Be conc. uncertainty | Be standard | Age ka BP (Lm) | Age unc. | Sample type | Reference           |
|---------------------------------------|--------------|---------------|-------------------|---------------|-----------------------|---------|-----------|---------|---------------------------------------------------------|------------------------------------|-------------|----------------|----------|-------------|---------------------|
| NU-1-10                               | 64.1780      | 51.6740       | 126               | std           | 2.6                   | 2.65    | 0.995     | 0       | 51500                                                   | 5400                               | 07KNSTD     | 10.55          | 1.12     | Boulder     | Winsor et al., 2015 |
| NU-3-10                               | 64.1780      | 51.6730       | 144               | std           | 1.9                   | 2.65    | 0.996     | 0       | 58500                                                   | 9200                               | 07KNSTD     | 11.69          | 1.85     | Boulder     | Winsor et al., 2015 |
| NU-7-2008                             | 64.1780      | 51.6720       | 146               | std           | 1.5                   | 2.65    | 0.997     | 0       | 48500                                                   | 5300                               | 07KNSTD     | 9.62           | 1.06     | Boulder     | Winsor et al., 2015 |
| NU-2-10                               | 64.1780      | 51.6720       | 149               | std           | 2.0                   | 2.65    | 0.997     | 0       | 74600                                                   | 12800                              | 07KNSTD     | 14.85          | 2.57     | Boulder     | Winsor et al., 2015 |
| NU-5-2008                             | 64.1820      | 51.6570       | 333               | std           | 2.0                   | 2.65    | 0.998     | 0       | 59900                                                   | 5200                               | 07KNSTD     | 9.85           | 0.86     | Boulder     | Winsor et al., 2015 |
| NU-4-2008                             | 64.1830      | 51.6570       | 334               | std           | 1.5                   | 2.65    | 0.998     | 0       | 58100                                                   | 3800                               | 07KNSTD     | 9.51           | 0.63     | Boulder     | Winsor et al., 2015 |
| NU-1-2008                             | 64.1870      | 51.6460       | 419               | std           | 2.5                   | 2.65    | 1.000     | 0       | 71500                                                   | 6000                               | 07KNSTD     | 10.85          | 0.92     | Boulder     | Winsor et al., 2015 |
| NU-2-2008                             | 64.1860      | 51.6460       | 422               | std           | 2.0                   | 2.65    | 1.000     | 0       | 70400                                                   | 6600                               | 07KNSTD     | 10.60          | 1.00     | Boulder     | Winsor et al., 2015 |
| NU-4-10                               | 64.1870      | 51.6450       | 427               | std           | 2.7                   | 2.65    | 1.000     | 0       | 75300                                                   | 16900                              | 07KNSTD     | 11.36          | 2.57     | Boulder     | Winsor et al., 2015 |
| NU-5-10                               | 64.1870      | 51.6450       | 427               | std           | 3.8                   | 2.65    | 1.000     | 0       | 63200                                                   | 9400                               | 07KNSTD     | 9.60           | 1.44     | Boulder     | Winsor et al., 2015 |
| <b>Mean (n=9) 10.35 ± 0.81 (0.83)</b> |              |               |                   |               |                       |         |           |         |                                                         |                                    |             |                |          |             |                     |
| BUK0876                               | 64.3560      | 49.2981       | 1303              | std           | 8                     | 2.65    | 1.000     | 0       | 235617                                                  | 6847                               | 07KNSTD     | 17.22          | 0.50     | Boulder     | Larsen et al., 2014 |
| BUK0879                               | 64.3547      | 49.2941       | 1263              | std           | 6                     | 2.65    | 0.9996    | 0       | 127926                                                  | 14106                              | 07KNSTD     | 9.47           | 1.05     | Boulder     | Larsen et al., 2014 |
| BUK0881                               | 64.3244      | 49.5740       | 760               | std           | 6                     | 2.65    | 1.000     | 0       | 113230                                                  | 14268                              | 07KNSTD     | 12.94          | 1.64     | Boulder     | Larsen et al., 2014 |
| BUK0883                               | 64.1489      | 50.6039       | 816               | std           | 2                     | 2.65    | 0.9998    | 0       | 94366                                                   | 2748                               | 07KNSTD     | 9.89           | 0.29     | Bedrock     | Larsen et al., 2014 |
| BUK0884                               | 64.1487      | 50.6034       | 817               | std           | 12                    | 2.65    | 0.9998    | 0       | 91400                                                   | 9959                               | 07KNSTD     | 10.38          | 1.14     | Boulder     | Larsen et al., 2014 |
| BUK0885                               | 64.1495      | 50.6015       | 817               | std           | 10                    | 2.65    | 0.9998    | 0       | 105446                                                  | 18667                              | 07KNSTD     | 11.80          | 2.11     | Boulder     | Larsen et al., 2014 |
| <b>Mean (n=3) 10.63 ± 0.99 (1.01)</b> |              |               |                   |               |                       |         |           |         |                                                         |                                    |             |                |          |             |                     |
| BUK0871                               | 64.0478      | 49.5806       | 1212              | std           | 8                     | 2.65    | 1.000     | 0       | 157453                                                  | 11761                              | 07KNSTD     | 12.36          | 0.93     | Boulder     | Larsen et al., 2014 |
| BUK0873                               | 64.0477      | 49.5820       | 1210              | std           | 10                    | 2.65    | 1.000     | 0       | 335158                                                  | 11729                              | 07KNSTD     | 26.94          | 0.95     | Bedrock     | Larsen et al., 2014 |
| BUK0874                               | 64.0456      | 49.5783       | 1179              | std           | 10                    | 2.65    | 0.9998    | 0       | 121766                                                  | 4469                               | 07KNSTD     | 9.97           | 0.37     | Boulder     | Larsen et al., 2014 |
| BUK0875                               | 64.0456      | 49.5783       | 1179              | std           | 8                     | 2.65    | 0.9998    | 0       | 124633                                                  | 5037                               | 07KNSTD     | 10.05          | 0.41     | Boulder     | Larsen et al., 2014 |
| <b>Mean (n=2) 9.95 ± 0.06 (0.19)</b>  |              |               |                   |               |                       |         |           |         |                                                         |                                    |             |                |          |             |                     |
| BUK0816                               | 63.9361      | 50.4359       | 1187              | std           | 6                     | 2.65    | 0.999     | 0       | 121710                                                  | 11716                              | 07KNSTD     | 9.58           | 0.93     | Boulder     | Larsen et al., 2014 |
| BUK0818                               | 63.9361      | 50.4359       | 1187              | std           | 5                     | 2.65    | 0.999     | 0       | 278459                                                  | 6506                               | 07KNSTD     | 21.87          | 0.52     | Boulder     | Larsen et al., 2014 |
| BUK0814                               | 63.9411      | 50.4407       | 1101              | std           | 4                     | 2.65    | 0.9996    | 0       | 110949                                                  | 3688                               | 07KNSTD     | 9.23           | 0.31     | Boulder     | Larsen et al., 2014 |
| BUK0815                               | 63.9411      | 50.4407       | 1101              | std           | 1                     | 2.65    | 0.9996    | 0       | 360531                                                  | 8632                               | 07KNSTD     | 29.52          | 0.71     | Bedrock     | Larsen et al., 2014 |
| <b>Mean (n=2) 9.35 ± 0.25 (0.30)</b>  |              |               |                   |               |                       |         |           |         |                                                         |                                    |             |                |          |             |                     |
| BUK0805                               | 63.8169      | 51.4063       | 360               | std           | 1                     | 2.65    | 0.9999    | 0       | 87723                                                   | 2836                               | 07KNSTD     | 13.94          | 0.45     | Bedrock     | Larsen et al., 2014 |
| BUK0802                               | 63.8261      | 51.3957       | 250               | std           | 2                     | 2.65    | 0.9998    | 0       | 61708                                                   | 3095                               | 07KNSTD     | 11.01          | 0.56     | Bedrock     | Larsen et al., 2014 |
| BUK0803                               | 63.8262      | 51.3958       | 250               | std           | 3                     | 2.65    | 0.9998    | 0       | 57744                                                   | 2795                               | 07KNSTD     | 10.38          | 0.51     | Boulder     | Larsen et al., 2014 |
| BUK0804                               | 63.8273      | 51.3942       | 220               | std           | 2                     | 2.65    | 0.9994    | 0       | 73119                                                   | 3782                               | 07KNSTD     | 13.48          | 0.70     | Bedrock     | Larsen et al., 2014 |
| BUK0801                               | 63.8280      | 51.3958       | 182               | std           | 3.5                   | 2.65    | 0.9936    | 0       | 55141                                                   | 3322                               | 07KNSTD     | 10.74          | 0.65     | Boulder     | Larsen et al., 2014 |
| <b>Mean (n=3) 10.65 ± 0.32 (0.37)</b> |              |               |                   |               |                       |         |           |         |                                                         |                                    |             |                |          |             |                     |
| BUK0806                               | 63.2333      | 51.1211       | 110               | std           | 4                     | 2.65    | 0.9742    | 0       | 39750                                                   | 4490                               | 07KNSTD     | 8.52           | 0.97     | Boulder     | Larsen et al., 2014 |
| BUK0807                               | 63.8540      | 51.1215       | 105               | std           | 1.5                   | 2.65    | 0.9742    | 0       | 46548                                                   | 2906                               | 07KNSTD     | 9.86           | 0.62     | Boulder     | Larsen et al., 2014 |
| BUK0809                               | 63.8532      | 51.1219       | 82                | std           | 2                     | 2.65    | 0.9742    | 0       | 43858                                                   | 2597                               | 07KNSTD     | 9.56           | 0.57     | Bedrock     | Larsen et al., 2014 |
| BUK0811                               | 63.8535      | 51.1224       | 80                | std           | 4                     | 2.65    | 0.9742    | 0       | 43933                                                   | 3754                               | 07KNSTD     | 9.75           | 0.84     | Bedrock     | Larsen et al., 2014 |
| <b>Mean (n=4) 9.36 ± 0.61 (0.64)</b>  |              |               |                   |               |                       |         |           |         |                                                         |                                    |             |                |          |             |                     |

Ages are calculated using version 3 of the exposure age calculator found at <https://hess.ess.washington.edu/> (wrapper: 3.0, muons: 1A, const: 3.0.3), which implements an updated treatment of muon-based production (Balco et al., 2008; Balco, 2017). All ages are calculated using 'Lm' scaling and a Baffin Bay production rate of  $4.04 \pm 0.07$  atoms g<sup>-1</sup> yr<sup>-1</sup> (Young et al., 2013), and reported relative to ka BP (CE 1950). This value has been updated from the CRONUS v2 value of  $3.96 \pm 0.07$  atoms g<sup>-1</sup> yr<sup>-1</sup>; the calibration dataset is the same. All samples use a density of 2.65 g cm<sup>-3</sup>, standard air pressure 'std', and an effective attenuation length of 160 g cm<sup>-2</sup>. <sup>10</sup>Be concentrations are reported relative to 07KNSTD with a reported ratio of  $2.85 \times 10^{-12}$  using a <sup>10</sup>Be half-life of  $1.387 \times 10^6$  years (Nishizumi et al., 2007; Chmieleff et al., 2010). Numbers in parentheses are the age uncertainties that include the uncertainty in the <sup>10</sup>Be production-rate calibration dataset.

Table S3. <sup>10</sup>Be sample information

| Sample                      | Latitude | Longitude | Elevation (m asl) | Thickness (cm) | Shielding | Quartz (g) | Carrier added (g) <sup>a</sup> | <sup>10</sup> Be/ <sup>9</sup> Be ratio <sup>b</sup> ± 1σ Uncertainty | Blank-corrected <sup>10</sup> Be concentration (atoms g <sup>-1</sup> ) <sup>c</sup> | Blank-corrected <sup>10</sup> Be conc. uncertainty (atoms g <sup>-1</sup> ) <sup>c</sup> | Age ka BP (Lm)      | Age ka BP uncertainty | Age ka relative to year of sample collection (CE 2017) | Age ka uncertainty | AMS Facility |           |
|-----------------------------|----------|-----------|-------------------|----------------|-----------|------------|--------------------------------|-----------------------------------------------------------------------|--------------------------------------------------------------------------------------|------------------------------------------------------------------------------------------|---------------------|-----------------------|--------------------------------------------------------|--------------------|--------------|-----------|
| Deglacial erratics (Fig. 1) |          |           |                   |                |           |            |                                |                                                                       |                                                                                      |                                                                                          |                     |                       |                                                        |                    |              |           |
| Caribou Lake                |          |           |                   |                |           |            |                                |                                                                       |                                                                                      |                                                                                          |                     |                       |                                                        |                    |              |           |
| 17GRO-01                    | 64.75141 | -49.56120 | 748               | 1.5            | 1         | 30.0636    | 0.2208                         | 1.4797E-13                                                            | 4.7319E-15                                                                           | 77994                                                                                    | 8.66                | 0.31                  | 8.73                                                   | 0.31               | PRIME        |           |
| 17GRO-02                    | 64.75278 | -49.55141 | 726               | 2              | 1         | 30.6487    | 0.2182                         | 1.4906E-13                                                            | 4.8063E-15                                                                           | 76160                                                                                    | 8.66                | 0.31                  | 8.73                                                   | 0.31               | PRIME        |           |
| 17GRO-04                    | 64.77811 | -49.54660 | 856               | 2              | 1         | 29.8967    | 0.2188                         | 1.7052E-13                                                            | 5.4488E-15                                                                           | 89563                                                                                    | 9.07                | 0.32                  | 9.14                                                   | 0.32               | PRIME        |           |
| Mean ± 1 S.D. (n=3)         |          |           |                   |                |           |            |                                |                                                                       |                                                                                      |                                                                                          | 8.80 ± 0.24 (0.29)  |                       |                                                        |                    |              |           |
| Deception Lake              |          |           |                   |                |           |            |                                |                                                                       |                                                                                      |                                                                                          |                     |                       |                                                        |                    |              |           |
| 17GRO-49                    | 63.97643 | -49.51587 | 931               | 2.5            | 1         | 30.8008    | 0.2199                         | 2.1844E-13                                                            | 5.9629E-15                                                                           | 111924                                                                                   | 10.66               | 0.34                  | 10.73                                                  | 0.34               | PRIME        |           |
| 17GRO-51                    | 63.97548 | -49.51407 | 928               | 3              | 1         | 28.7113    | 0.2133                         | 1.8645E-13                                                            | 5.5434E-15                                                                           | 99409                                                                                    | 9.52                | 0.32                  | 9.59                                                   | 0.32               | PRIME        |           |
| One-way Lake                |          |           |                   |                |           |            |                                |                                                                       |                                                                                      |                                                                                          |                     |                       |                                                        |                    |              |           |
| 17GRO-53                    | 63.91561 | -49.69950 | 900               | 3              | 1         | 30.9295    | 0.2207                         | 3.2554E-13                                                            | 8.3863E-15                                                                           | 166707                                                                                   | 16.43               | 0.49                  | 16.50                                                  | 0.49               | PRIME        |           |
| 17GRO-54                    | 63.90542 | -49.67972 | 885               | 2              | 1         | 30.9295    | 0.2207                         | 1.5684E-13                                                            | 4.7246E-15                                                                           | 78459                                                                                    | 7.72                | 0.26                  | 7.79                                                   | 0.26               | PRIME        |           |
| Qamanarsuup Sermia          |          |           |                   |                |           |            |                                |                                                                       |                                                                                      |                                                                                          |                     |                       |                                                        |                    |              |           |
| Outboard erratics           |          |           |                   |                |           |            |                                |                                                                       |                                                                                      |                                                                                          |                     |                       |                                                        |                    |              |           |
| 17GRO-46                    | 64.45596 | -49.45530 | 769               | 1.30           | 1         | 28.0742    | 0.1944                         | 1.9777E-13                                                            | 4.9100E-15                                                                           | 94977                                                                                    | 10.34               | 0.31                  | 10.41                                                  | 0.31               | PRIME        |           |
| 17GRO-47                    | 64.45605 | -49.45560 | 763               | 2.04           | 1         | 30.1333    | 0.2017                         | 1.9794E-13                                                            | 4.7500E-15                                                                           | 91901                                                                                    | 10.12               | 0.29                  | 10.19                                                  | 0.29               | PRIME        |           |
| 17GRO-48                    | 64.45573 | -49.45563 | 767               | 2.94           | 1         | 28.3832    | 0.2009                         | 1.9139E-13                                                            | 5.0500E-15                                                                           | 93953                                                                                    | 10.39               | 0.32                  | 10.46                                                  | 0.32               | PRIME        |           |
| Mean ± 1 S.D. (n=3)         |          |           |                   |                |           |            |                                |                                                                       |                                                                                      |                                                                                          | 10.29 ± 0.14 (0.23) |                       |                                                        |                    |              |           |
| Moraine boulders            |          |           |                   |                |           |            |                                |                                                                       |                                                                                      |                                                                                          |                     |                       |                                                        |                    |              |           |
| 17GRO-15                    | 64.45831 | -49.44410 | 751               | 3.02           | 1         | 19.7464    | 0.2003                         | 1.4011E-13                                                            | 4.6800E-15                                                                           | 98440                                                                                    | 11.01               | 0.41                  | 11.08                                                  | 0.41               | PRIME        |           |
| 17GRO-16                    | 64.45847 | -49.44398 | 753               | 1.28           | 1         | 35.0774    | 0.2031                         | 2.1211E-13                                                            | 5.4300E-15                                                                           | 84198                                                                                    | 9.40                | 0.28                  | 9.47                                                   | 0.28               | PRIME        |           |
| 17GRO-17                    | 64.45937 | -49.43946 | 783               | 1.39           | 1         | 22.8280    | 0.1996                         | 1.4656E-13                                                            | 5.0300E-15                                                                           | 88777                                                                                    | 9.51                | 0.36                  | 9.58                                                   | 0.36               | PRIME        |           |
| 17GRO-18                    | 64.45869 | -49.43322 | 767               | 1.20           | 1         | 20.7362    | 0.1816                         | 1.4575E-13                                                            | 3.6438E-15                                                                           | 87519                                                                                    | 9.65                | 0.28                  | 9.72                                                   | 0.28               | LLNL-CAMS    |           |
| 17GRO-19                    | 64.45899 | -49.43517 | 771               | 3.14           | 1         | 35.0537    | 0.2026                         | 3.2930E-13                                                            | 6.3100E-15                                                                           | 130625                                                                                   | 13.87               | 0.46                  | 14.00                                                  | 0.46               | PRIME        |           |
| 17GRO-20                    | 64.45869 | -49.43216 | 769               | 3.20           | 1         | 35.1117    | 0.2027                         | 2.6302E-13                                                            | 6.0300E-15                                                                           | 104161                                                                                   | 11.67               | 0.32                  | 11.74                                                  | 0.32               | PRIME        |           |
| 17GRO-28                    | 64.46225 | -49.42881 | 811               | 2.48           | 1         | 40.0369    | 0.2036                         | 5.4682E-13                                                            | 8.9400E-15                                                                           | 191011                                                                                   | 24.22               | 20.34                 | 0.45                                                   | 20.41              | 0.45         | PRIME     |
| 17GRO-29                    | 64.46424 | -49.42605 | 817               | 1.19           | 1         | 38.4270    | 0.2036                         | 2.4708E-13                                                            | 6.3100E-15                                                                           | 89844                                                                                    | 9.36                | 0.28                  | 9.43                                                   | 0.28               | PRIME        |           |
| 17GRO-31                    | 64.46506 | -49.42405 | 822               | 1.76           | 1         | 28.0196    | 0.1823                         | 3.5771E-13                                                            | 6.5878E-15                                                                           | 159706                                                                                   | 16.72               | 0.40                  | 16.79                                                  | 0.40               | LLNL-CAMS    |           |
| 17GRO-32                    | 64.46567 | -49.42298 | 823               | 2.18           | 1         | 39.7783    | 0.2033                         | 2.5143E-13                                                            | 6.4600E-15                                                                           | 88192                                                                                    | 9.21                | 0.27                  | 9.28                                                   | 0.27               | PRIME        |           |
| 17GRO-34                    | 64.46509 | -49.43287 | 835               | 2.13           | 1         | 35.0552    | 0.2018                         | 2.2624E-13                                                            | 5.7800E-15                                                                           | 89304                                                                                    | 9.33                | 0.28                  | 9.40                                                   | 0.28               | PRIME        |           |
| 17GRO-35                    | 64.46796 | -49.43473 | 835               | 1.02           | 1         | 8.7955     | 0.1825                         | 6.6728E-14                                                            | 1.6682E-15                                                                           | 94602                                                                                    | 2.92                | 0.80                  | 2.97                                                   | 0.80               | LLNL-CAMS    |           |
| 17GRO-36                    | 64.46804 | -49.43491 | 868               | 1.11           | 1         | 18.6680    | 0.1815                         | 1.4305E-13                                                            | 3.5763E-15                                                                           | 95356                                                                                    | 2.92                | 0.80                  | 2.97                                                   | 0.80               | LLNL-CAMS    |           |
| 17GRO-37                    | 64.46714 | -49.43700 | 867               | 2.80           | 1         | 39.4030    | 0.2034                         | 2.8144E-13                                                            | 9.2100E-15                                                                           | 99725                                                                                    | 10.07               | 0.36                  | 10.14                                                  | 0.37               | PRIME        |           |
| 17GRO-38                    | 64.46686 | -49.43781 | 861               | 1.40           | 1         | 15.7109    | 0.1827                         | 1.1190E-13                                                            | 1.8229E-15                                                                           | 88883                                                                                    | 8.91                | 0.20                  | 8.98                                                   | 0.20               | LLNL-CAMS    |           |
| 17GRO-39                    | 64.46519 | -49.44123 | 810               | 1.28           | 1         | 10.0196    | 0.1838                         | 7.3228E-14                                                            | 1.4760E-15                                                                           | 91435                                                                                    | 2.328               | 0.59                  | 2.34                                                   | 0.66               | 0.25         | LLNL-CAMS |
| 17GRO-40                    | 64.46251 | -49.44231 | 769               | 2.20           | 1         | 41.8017    | 0.2038                         | 2.5932E-13                                                            | 6.5200E-15                                                                           | 86774                                                                                    | 25.45               | 0.51                  | 25.48                                                  | 0.58               | PRIME        |           |
| 17GRO-41                    | 64.46290 | -49.44788 | 759               | 1.37           | 1         | 41.2628    | 0.2037                         | 2.5931E-13                                                            | 6.2800E-15                                                                           | 87861                                                                                    | 25.08               | 0.65                  | 25.08                                                  | 0.72               | 0.28         | PRIME     |
| 17GRO-42                    | 64.46244 | -49.45117 | 757               | 2.71           | 0.999     | 40.0588    | 0.2035                         | 2.6083E-13                                                            | 6.1100E-15                                                                           | 90943                                                                                    | 25.35               | 10.13                 | 25.38                                                  | 10.20              | 0.28         | PRIME     |
| 17GRO-44                    | 64.46081 | -49.44620 | 767               | 2.85           | 0.999     | 32.6832    | 0.2040                         | 2.1244E-13                                                            | 6.2900E-15                                                                           | 90979                                                                                    | 30.27               | 10.06                 | 30.33                                                  | 10.13              | 0.34         | PRIME     |
| 17GRO-45                    | 64.46078 | -49.44607 | 766               | 2.56           | 0.999     | 39.6378    | 0.2042                         | 2.3707E-13                                                            | 6.1100E-15                                                                           | 83812                                                                                    | 25.05               | 9.24                  | 25.08                                                  | 9.31               | 0.28         | PRIME     |
| Mean ± 1 S.D. (n=16)        |          |           |                   |                |           |            |                                |                                                                       |                                                                                      |                                                                                          | 9.57 ± 0.33 (0.38)  |                       |                                                        |                    |              |           |
| Inboard erratics            |          |           |                   |                |           |            |                                |                                                                       |                                                                                      |                                                                                          |                     |                       |                                                        |                    |              |           |
| 17GRO-25                    | 64.46959 | -49.42904 | 839               | 1.52           | 1         | 35.1290    | 0.1985                         | 2.2934E-13                                                            | 5.4200E-15                                                                           | 89925                                                                                    | 9.21                | 0.26                  | 9.28                                                   | 0.26               | PRIME        |           |
| 17GRO-26                    | 64.46943 | -49.43203 | 857               | 1.61           | 1         | 30.0347    | 0.2002                         | 2.0042E-13                                                            | 4.7200E-15                                                                           | 92665                                                                                    | 9.35                | 0.27                  | 9.42                                                   | 0.27               | PRIME        |           |
| 17GRO-27                    | 64.46996 | -49.43845 | 824               | 2.12           | 1         | 23.8896    | 0.2004                         | 1.5356E-13                                                            | 4.2900E-15                                                                           | 89261                                                                                    | 9.31                | 0.30                  | 9.38                                                   | 0.30               | PRIME        |           |
| Mean ± 1 S.D. (n=3)         |          |           |                   |                |           |            |                                |                                                                       |                                                                                      |                                                                                          | 9.29 ± 0.07 (0.18)  |                       |                                                        |                    |              |           |
| Kanglata Nunaata Sermia     |          |           |                   |                |           |            |                                |                                                                       |                                                                                      |                                                                                          |                     |                       |                                                        |                    |              |           |
| Deglacial landscape         |          |           |                   |                |           |            |                                |                                                                       |                                                                                      |                                                                                          |                     |                       |                                                        |                    |              |           |
| 17GRO-05                    | 64.28653 | -49.48825 | 790               | 1.71           | 1         | 25.1512    | 0.1810                         | 1.8669E-13                                                            | 3.3605E-15                                                                           | 93272                                                                                    | 21.92               | 10.00                 | 0.24                                                   | 10.06              | 0.24         | LLNL-CAMS |
| 17GRO-06                    | 64.28651 | -49.48830 | 790               | 2.32           | 1         | 25.7869    | 0.1800                         | 1.9697E-13                                                            | 3.5454E-15                                                                           | 95460                                                                                    | 22.43               | 10.28                 | 0.24                                                   | 10.35              | 0.24         | LLNL-CAMS |
| 17GRO-07                    | 64.28658 | -49.48794 | 788               | 1.60           | 1         | 7.0405     | 0.1810                         | 6.7698E-14                                                            | 2.8127E-15                                                                           | 119635                                                                                   | 5.326               | 12.86                 | 0.57                                                   | 12.93              | 0.58         | LLNL-CAMS |
| 17GRO-61                    | 64.28960 | -49.80013 | 660               | 2.90           | 1         | 25.0166    | 0.2024                         | 1.6780E-13                                                            | 4.2580E-15                                                                           | 93966                                                                                    | 27.78               | 11.44                 | 0.34                                                   | 11.51              | 0.34         | PRIME     |
| 17GRO-69                    | 64.29240 | -49.79993 | 685               | 1.49           | 1         | 25.0490    | 0.2024                         | 1.6944E-13                                                            | 4.3800E-15                                                                           | 94763                                                                                    | 28.41               | 11.15                 | 0.34                                                   | 11.21              | 0.34         | PRIME     |
| 17GRO-70                    | 64.29148 | -49.79569 | 655               | 5.12           | 1         | 5.3244     | 0.1816                         | 4.1336E-14                                                            | 1.3512E-15                                                                           | 82228                                                                                    | 3354                | 10.23                 | 0.42                                                   | 10.30              | 0.42         | LLNL-CAMS |
| Kapisigdlit stade moraine   |          |           |                   |                |           |            |                                |                                                                       |                                                                                      |                                                                                          |                     |                       |                                                        |                    |              |           |
| 17GRO-56                    | 64.29505 | -49.78128 | 774               | 1.87           | 1         | 10.6138    | 0.1832                         | 7.8340E-14                                                            | 3.0392E-15                                                                           | 93336                                                                                    | 3904                | 10.16                 | 0.43                                                   | 10.22              | 0.43         | LLNL-CAMS |
| 17GRO-58                    | 64.29417 | -49.79294 | 693               | 2.79           | 1         | 13.6518    | 0.1840                         | 1.0204E-13                                                            | 2.7394E-15                                                                           | 95095                                                                                    | 2932                | 11.22                 | 0.35                                                   | 11.29              | 0.35         | LLNL-CAMS |
| 17GRO-59                    | 64.29485 | -49.79568 | 694               | 2.22           | 1         | 30.3514    | 0.2030                         | 1.9360E-13                                                            | 5.9200E-15                                                                           | 89530                                                                                    | 3061                | 10.50                 | 0.36                                                   | 10.57              | 0.36         | PRIME     |
| 17GRO-62                    | 64.29332 | -49.80750 | 626               | 3.12           | 0.991     | 30.1856    | 0.2033                         | 9.2021E-14                                                            | 3.5900E-15                                                                           | 42742                                                                                    | 1803                | 5.38                  | 0.23                                                   | 5.45               | 0.23         | PRIME     |
| 17GRO-63                    | 64.29415 | -49.80329 | 669               | 3.04           | 1         | 12.4228    | 0.1831                         | 5.5057E-14                                                            | 1.1802E-15                                                                           | 56001                                                                                    | 1474                | 6.73                  | 0.18                                                   | 6.80               | 0.18         | LLNL-CAMS |
| 17GRO-64                    | 64.29420 | -49.80260 | 671               | 1.89           | 1         | 30.1880    | 0.2038                         | 1.4427E-13                                                            | 4.8900E-15                                                                           | 87605                                                                                    | 3264                | 10.46                 | 0.39                                                   | 10.53              | 0.39         | PRIME     |
| 17GRO-66                    | 64.29460 | -49.79980 | 683               | 3.29           | 1         | 30.2354    | 0.2032                         | 1.7729E-13                                                            | 4.2600E-15                                                                           | 82366                                                                                    | 2345                | 9.84                  | 0.28                                                   | 9.91               | 0.28         | PRIME     |
| Mean ± 1 S.D. (n=4)         |          |           |                   |                |           |            |                                |                                                                       |                                                                                      |                                                                                          | 10.24 ± 0.31 (0.36) |                       |                                                        |                    |              |           |
| Inboard erratics            |          |           |                   |                |           |            |                                |                                                                       |                                                                                      |                                                                                          |                     |                       |                                                        |                    |              |           |
| 17GRO-67                    | 64.29749 | -49.80284 | 662               | 2.42           | 1         | 25.0681    | 0.2029                         | 1.5131E-13                                                            | 4.0100E-15                                                                           | 84750                                                                                    | 2590                | 10.25                 | 0.31                                                   | 10.32              | 0.32         | PRIME     |
| 17GRO-68                    | 64.29739 | -49.80359 | 660               | 2.94           | 1         | 25.9659    | 0.2015                         | 1.5715E-13                                                            | 3.7800E-15                                                                           | 84396                                                                                    | 2401                | 10.27                 | 0.29                                                   | 10.34              | 0.29         | PRIME     |
| Inboard of historical limit |          |           |                   |                |           |            |                                |                                                                       |                                                                                      |                                                                                          |                     |                       |                                                        |                    |              |           |
| 17GRO-08                    | 64.28653 | -49.48321 | 769               | 2.04           | 1         | 31.2019    | 0.1785                         | 4.0130E-13                                                            | 8.8803E-15                                                                           | 158742                                                                                   | 4249                | 17.46                 | 0.47                                                   | 17.53              | 0.47         | LLNL-CAMS |
| 17GRO-09                    | 64.28315 | -49.47899 | 772               | 1.77           | 1         | 10.8469    | 0.1795                         | 1.3729E-13                                                            | 2.8457E-15                                                                           | 156733                                                                                   | 4026                | 17.15                 | 0.44                                                   | 17.22              | 0.44         | LLNL-CAMS |
| 17GRO-10                    | 64.28052 | -49.47035 | 675               | 1.19           | 1         | 46.1370    | 0.1785                         | 4.0805E-13                                                            | 7.5388E-15                                                                           | 109163                                                                                   | 2601                | 12.95                 | 0.31                                                   | 13.02              | 0.31         | LLNL-CAMS |
| 17GRO-11                    | 64.28105 | -49.46340 | 638               | 1.48           | 0.993     | 15.0238    | 0.1799                         | 9.7428E-14                                                            | 1.8696E-15                                                                           | 80569                                                                                    | 1972                | 9.96                  | 0.24                                                   | 10.02              | 0.25         | LLNL-CAMS |
| 17GRO-12                    | 64.28090 | -49.45737 | 591               | 1.36           | 0.993     | 15.0822    | 0.1817                         | 2.2111E-13                                                            | 3.5500E-15                                                                           | 184334                                                                                   | 4058                | 23.93                 | 0.53                                                   | 24.00              | 0.53         | LLNL-CAMS |
| 17GRO-13                    | 64.28094 | -49.45633 | 600               | 1.68           | 0.993     | 15.0463    | 0.1818                         | 1.4108E-13                                                            | 3.0518E-15                                                                           | 117860                                                                                   | 3111                | 15.16                 | 0.40                                                   | 15.23              | 0.40         | LLNL-CAMS |
| 17GRO-14                    | 64.28088 | -49.45694 | 599               | 1.17           | 0.993     | 51.2658    | 0.1808                         | 6.3280E-13                                                            | 8.1963E-15                                                                           | 154381                                                                                   | 3062                | 19.83                 | 0.40                                                   | 19.90              | 0.40         | LLNL-CAMS |
| 17GRO-71                    | 64.28185 | -49.45657 | 600               | 0.88           | 1         | 25.2632    | 0.1794                         | 1.1010E-13                                                            | 2.0479E-15                                                                           | 54215                                                                                    | 1302                | 6.83                  | 0.16                                                   | 6.90               | 0.17         | LLNL-CAMS |
| 17GRO-72                    | 64.22263 | -49.58746 | 461               | 2.89           | 1         | 25.0590    | 0.1826                         | 9.4590E-14                                                            | 1.6493E-15                                                                           | 47598                                                                                    | 1100                | 6.94                  | 0.16                                                   | 7.01               | 0.16         | LLNL-CAMS |
| 17GRO-73                    | 64.22220 | -49.58950 | 458               | 1.67           | 1         | 25.0650    | 0.1811                         | 9.3106E-14                                                            | 1.6945E-15                                                                           | 46618                                                                                    | 1106                | 6.75                  | 0.16                                                   | 6.81               | 0.16         | LLNL-CAMS |
| 17GRO-74                    | 64.22466 | -49.58567 | 483               | 1.32           | 1         | 25.4747    | 0.1820                         | 9.3715E-14                                                            | 1.4880E-15                                                                           | 46234                                                                                    | 1015                | 6.51                  | 0.14                                                   | 6.58               | 0.14         | LLNL-CAMS |
| 17GRO-75                    | 64.22476 | -49.58792 | 481               | 3.70           | 1         | 25.0880    | 0.1826                         | 9.0714E-14                                                            | 1.3972E-15                                                                           | 45588                                                                                    | 1847                | 6.56                  | 0.27                                                   | 6.63               | 0.27         | LLNL-CAMS |

**Table S4. <sup>10</sup>Be data process blank**

| Sample ID              | Carrier added (g) | Carrier concentration | <sup>10</sup> Be/ <sup>9</sup> Be ratio ± 1σ (10 <sup>-16</sup> ) | <sup>10</sup> Be atoms | Samples applied to (Tables S3):                  |
|------------------------|-------------------|-----------------------|-------------------------------------------------------------------|------------------------|--------------------------------------------------|
| <i>LDEO Carrier 6</i>  |                   |                       |                                                                   |                        |                                                  |
| BLK2_2018Apr13         | 0.1791            | 1035.7                | 4.830 ± 1.157                                                     | <b>5990 ± 1437</b>     | 17GRO-07, -08, -09, -10, -14                     |
| BLK1_2018May14         | 0.2030            | 1036.8                | 4.500 ± 3.500                                                     | <b>6331 ± 4925</b>     | 17GRO-59, -62, -64, -66,                         |
| BLK1_2018May14         | 0.1832            | 1036.8                | 2.320 ± 0.698                                                     | <b>2942 ± 1031</b>     | 17GRO-58, -63                                    |
| BLK2_2018May31         | 0.1817            | 1036.9                | 3.450 ± 1.090                                                     | <b>4350 ± 1376</b>     | 17GRO-11, -12, -13, -72, -74, -75                |
| BLK_2018Jul6           | 0.2028            | 1037.4                | 3.100 ± 2.400                                                     | <b>4359 ± 3376</b>     | 17GRO-61, -67, -68, -69                          |
| BLK_2018Jul23          | 0.1827            | 1037.6                | 3.740 ± 1.322                                                     | <b>4738 ± 1677</b>     | 17GRO-56                                         |
| BLK1_2019Jan28         | 0.1791            | 1041.2                | 4.700 ± 1.600                                                     | <b>5869 ± 1956</b>     | 17GRO-06, -06                                    |
| BLK2_2019Jan28         | 0.1801            | 1041.2                | 4.000 ± 1.200                                                     | <b>5016 ± 1514</b>     | 17GRO-71, -73                                    |
| BLK3_2019Jan28         | 0.2000            | 1041.2                | 6.700 ± 4.200                                                     | <b>9326 ± 5848</b>     | 17GRO-15, -17, -25, -26, -27, -46, -47, -48      |
| <i>LDEO Carrier 7</i>  |                   |                       |                                                                   |                        |                                                  |
| BLK1_2019Mar13         | 0.1828            | 1028.3                | 21.010 ± 2.314                                                    | 26399 ± 2935           |                                                  |
| BLK2_2019Mar13         | 0.1830            | 1028.3                | 6.700 ± 4.200                                                     | 15106 ± 2234           |                                                  |
|                        |                   |                       | <b>Mean ± 1 S.D. (n=2)</b>                                        | <b>20753 ± 7985</b>    | 17GRO-70                                         |
| BLK1_2019Apr15         | 0.2022            | 1028.8                | 6.500 ± 2.700                                                     | <b>9038 ± 3757</b>     | 17GRO-16, -19, -20, -34                          |
| BLK2_2019Apr15         | 0.1825            | 1028.8                | 4.290 ± 2.100                                                     | <b>5378 ± 2636</b>     | 17GRO-18, -35, -36                               |
| BLK_2019Sep13          | 0.2040            | 1028.4                | 4.000 ± 2.000                                                     | <b>5609 ± 2806</b>     | 17GRO-28, -29, -32, -37, -40, -41, -42, -44, -45 |
| BLK_2019Oct7           | 0.1835            | 1028.8                | 7.470 ± 1.465                                                     | <b>9430 ± 1854</b>     | 17GRO-31, -38, -39                               |
| <i>Buffalo Carrier</i> |                   |                       |                                                                   |                        |                                                  |
| 99_Blank               | 0.2176            | 1074                  | 13.660 ± 2.540                                                    | <b>21332 ± 3979</b>    | 17GRO-01, -02, -04, -49, -51, -53, -54           |

All <sup>10</sup>Be concentrations are reported relative to 07KNNSTD with a reported ratio of 2.85 × 10<sup>-12</sup> using a <sup>10</sup>Be half-life of 1.387 × 10<sup>6</sup> years (Nishiizumi et al., 2007; Chemeleff et al., 2010).

**Table S5. <sup>26</sup>Al sample information**

| Sample         | Quartz(g) | <sup>26</sup> Al/ <sup>27</sup> Al ratio | <sup>26</sup> Al/ <sup>27</sup> Al ratio uncertainty | Total <sup>27</sup> Al (mg) | <sup>26</sup> Al concentration (atoms g <sup>-1</sup> ) | <sup>26</sup> Al uncertainty (atoms g <sup>-1</sup> ) | <sup>10</sup> Be concentration (atoms g <sup>-1</sup> ); From Table S3 | <sup>10</sup> Be conc. uncertainty (atoms g <sup>-1</sup> ); From Table S3 | <sup>26</sup> Al/ <sup>10</sup> Be | <sup>26</sup> Al/ <sup>10</sup> Be unc. |
|----------------|-----------|------------------------------------------|------------------------------------------------------|-----------------------------|---------------------------------------------------------|-------------------------------------------------------|------------------------------------------------------------------------|----------------------------------------------------------------------------|------------------------------------|-----------------------------------------|
| 17GRO-08       | 15.0285   | 4.5763E-13                               | 1.6277E-14                                           | 1.5709 ± 0.0014             | 1065240                                                 | 38006                                                 | 158742                                                                 | 4249                                                                       | 6.71                               | 0.24 (0.48)                             |
| 17GRO-09       | 34.6949   | 1.0122E-12                               | 1.9350E-14                                           | 1.7359 ± 0.0035             | 1128431                                                 | 21620                                                 | 156733                                                                 | 4026                                                                       | 7.20                               | 0.14 (0.28)                             |
| 17GRO-10       | 15.1387   | 3.3135E-13                               | 1.1121E-14                                           | 1.5616 ± 0.0014             | 760447                                                  | 25647                                                 | 109163                                                                 | 2601                                                                       | 6.97                               | 0.23 (0.46)                             |
| 17GRO-11       | 15.0238   | 2.6506E-13                               | 1.1792E-14                                           | 1.5191 ± 0.0104             | 595722                                                  | 26652                                                 | 80569                                                                  | 1972                                                                       | 7.39                               | 0.33 (0.66)                             |
| 17GRO-12       | 15.0822   | 5.0571E-13                               | 1.5749E-14                                           | 1.6578 ± 0.0016             | 1238250                                                 | 38666                                                 | 184334                                                                 | 4058                                                                       | 6.72                               | 0.21 (0.42)                             |
| 17GRO-13       | 15.0463   | 3.0867E-13                               | 1.2881E-14                                           | 1.5534 ± 0.0050             | 708831                                                  | 29721                                                 | 117860                                                                 | 3111                                                                       | 6.01                               | 0.25 (0.50)                             |
| 17GRO-14       | 15.0234   | 4.7365E-13                               | 1.3539E-14                                           | 1.5177 ± 0.0041             | 1065557                                                 | 30564                                                 | 154381                                                                 | 3062                                                                       | 6.90                               | 0.20 (0.40)                             |
| 17GRO-71       | 25.2632   | 3.2964E-13                               | 1.4670E-14                                           | 1.3700 ± 0.0021             | 398413                                                  | 17757                                                 | 54215                                                                  | 1302                                                                       | 7.35                               | 0.33 (0.66)                             |
| 17GRO-72       | 25.0590   | 2.4686E-13                               | 9.3836E-15                                           | 1.5168 ± 0.0048             | 332019                                                  | 12708                                                 | 47598                                                                  | 1100                                                                       | 6.98                               | 0.27 (0.54)                             |
| 17GRO-73       | 25.0650   | 2.6232E-13                               | 1.3220E-14                                           | 1.3941 ± 0.0021             | 325062                                                  | 16412                                                 | 46618                                                                  | 1106                                                                       | 6.97                               | 0.35 (0.70)                             |
| 17GRO-74       | 25.4747   | 2.4783E-13                               | 9.7431E-15                                           | 1.5592 ± 0.0021             | 337103                                                  | 13339                                                 | 46234                                                                  | 1015                                                                       | 7.29                               | 0.29 (0.58)                             |
| 17GRO-75       | 25.0880   | 2.2256E-13                               | 9.9319E-15                                           | 1.6241 ± 0.0025             | 320105                                                  | 14378                                                 | 45588                                                                  | 1847                                                                       | 7.02                               | 0.32 (0.64)                             |
| Process blanks |           |                                          |                                                      |                             | Blank atoms                                             | Atoms uncertainty                                     | Samples applied to                                                     |                                                                            |                                    |                                         |
| BLK2_2018May13 | NA        | 1.0949E-15                               | 6.4322E-16                                           | 1.5327 ± 0.0027             | 37456                                                   | 22005                                                 | 17GRO-08, -10, -11, -12, -13, -14, -72, -74, -75                       |                                                                            |                                    |                                         |
| BLK2_2019Jan28 | NA        | 3.9000E-16                               | 3.9000E-16                                           | 1.7337 ± 0.0026             | 15092                                                   | 15092                                                 | 17GRO-71, -73                                                          |                                                                            |                                    |                                         |
| BLK_2019Jun19  | NA        | 1.7600E-15                               | 5.9000E-16                                           | 1.7616 ± 0.0025             | 69204                                                   | 23199                                                 | 17GRO-09                                                               |                                                                            |                                    |                                         |

All samples were measured at PRIME.

Aluminum extraction for samples 17GRO-08, -09, -10, and -14 was completed independently of the beryllium extraction and therefore have different quartz weights than what is listed in Table S3.

We report the 1-sigma ratio uncertainty; 2-sigma uncertainty is in parentheses.

Table S6a. *In situ* <sup>14</sup>C sample extraction details

| Sample   | Quartz (g) | Carbon yield (μgC) | Carbon yield unc. (μg C) | Diluted carbon mass (μg C) | Diluted carbon mass unc. (μg C) | F <sub>m</sub> | F <sub>m</sub> unc. | δ <sup>13</sup> C (‰) | <sup>14</sup> C/C <sub>total</sub> | <sup>14</sup> C/C <sub>total</sub> unc. | <sup>14</sup> C concentration (atoms/g) | <sup>14</sup> C concentration unc. (atoms/g) | Blank correction applied (#of atoms) | Blank correction unc. (#of atoms) | Age ka BP (Lm) | Age ka BP unc. | Age ka (Lm) | Age ka unc. | Measurement facility |
|----------|------------|--------------------|--------------------------|----------------------------|---------------------------------|----------------|---------------------|-----------------------|------------------------------------|-----------------------------------------|-----------------------------------------|----------------------------------------------|--------------------------------------|-----------------------------------|----------------|----------------|-------------|-------------|----------------------|
| 17GRO-08 | 5.1644     | 21.75              | 0.25                     | 21.75                      | 0.25                            | 0.8535         | 0.0100              | -26.8                 | 9.7542E-13                         | 1.1429E-14                              | 189794                                  | 8544                                         | 81094                                | 6972                              | 10.11          | 0.89           | 10.18       | 0.90        | CEREGE               |
| 17GRO-09 | 5.1392     | 21.37              | 0.25                     | 21.37                      | 0.25                            | 0.8246         | 0.0108              | -27.9                 | 9.4028E-13                         | 1.2315E-14                              | 184202                                  | 8127                                         | 81094                                | 6972                              | 9.46           | 0.78           | 9.53        | 0.79        | CEREGE               |
| 17GRO-10 | 5.1049     | 20.59              | 0.24                     | 20.59                      | 0.24                            | 0.8169         | 0.0084              | -27.5                 | 9.3226E-13                         | 9.5862E-15                              | 172735                                  | 7513                                         | 81094                                | 6972                              | 9.70           | 0.80           | 9.77        | 0.81        | CEREGE               |
| 17GRO-11 | 5.1287     | 53.13              | 0.61                     | 53.13                      | 0.61                            | 0.3009         | 0.0083              | -15.3                 | 3.5201E-13                         | 9.7333E-15                              | 166922                                  | 8716                                         | 81094                                | 6972                              | 9.80           | 0.98           | 9.87        | 0.99        | CEREGE               |
| 17GRO-12 | 5.0083     | 49.15              | 0.56                     | 49.15                      | 0.56                            | 0.2510         | 0.0032              | -14.9                 | 2.9383E-13                         | 3.6906E-15                              | 128534                                  | 5886                                         | 81094                                | 6972                              | 6.68           | 0.48           | 6.75        | 0.48        | CEREGE               |
| 17GRO-13 | 5.1844     | 48.25              | 0.55                     | 48.25                      | 0.55                            | 0.2603         | 0.0038              | -14.6                 | 3.0495E-13                         | 4.4518E-15                              | 125901                                  | 5872                                         | 85768                                | 12070                             | 6.49           | 0.46           | 6.56        | 0.46        | CEREGE               |
| 17GRO-14 | 4.9156     | 57.24              | 0.66                     | 789.71                     | 9.04                            | 0.0182         | 0.0002              | -17.7                 | 1.8419E-14                         | 3.9852E-16                              | 124587                                  | 9594                                         | 116894                               | 37307                             | 6.29           | 0.73           | 6.36        | 0.74        | LLNL-CAMS            |
| 17GRO-71 | 5.1134     | 40.36              | 0.46                     | 40.36                      | 0.46                            | 0.3236         | 0.0037              | -16.5                 | 3.7765E-13                         | 4.3180E-15                              | 134483                                  | 6084                                         | 81094                                | 6972                              | 6.99           | 0.50           | 7.06        | 0.50        | CEREGE               |
| 17GRO-72 | 5.0072     | 25.52              | 0.29                     | 57.09                      | 0.70                            | 0.1879         | 0.0026              | -14.6                 | 2.2013E-13                         | 3.0460E-15                              | 109666                                  | 5147                                         | 81094                                | 6972                              | 6.27           | 0.45           | 6.34        | 0.45        | CEREGE               |
| 17GRO-73 | 5.1060     | 40.58              | 0.47                     | 65.31                      | 0.75                            | 0.1716         | 0.0025              | -14.1                 | 2.0119E-13                         | 2.9046E-15                              | 113122                                  | 5254                                         | 81094                                | 6972                              | 6.52           | 0.47           | 6.59        | 0.47        | CEREGE               |
| 17GRO-74 | 4.0181     | 51.69              | 0.59                     | 794.46                     | 9.10                            | 0.0140         | 0.0002              | -17.7                 | 1.3525E-14                         | 3.9920E-16                              | 105002                                  | 10923                                        | 116894                               | 37307                             | 5.62           | 0.84           | 5.69        | 0.85        | LLNL-CAMS            |
| 17GRO-75 | 4.9974     | 25.90              | 0.30                     | 56.03                      | 0.64                            | 0.1935         | 0.0029              | -22.1                 | 2.2327E-13                         | 3.3342E-15                              | 109215                                  | 5122                                         | 81094                                | 6972                              | 6.12           | 0.43           | 6.19        | 0.43        | CEREGE               |

<sup>14</sup>C concentration uncertainty includes the raw measurement uncertainty and a 3.6% uncertainty propagated through to reflect the LDEO scatter in CRONUS-A measurements (updated from Lamp et al., 2019).

17GRO-14 and 17GRO-71 use an assumed δ<sup>13</sup>C value of -17.7. Due to the large dilution factor, the δ<sup>13</sup>C signal is dominated by the δ<sup>13</sup>C of the dilution gas (Lamp et al., 2019).

Table S6b. *In situ* <sup>14</sup>C blank extraction details

|                |    |       |      |       |      |        |        |       |            |            |        |      |  |  |  |  |  |  |  |
|----------------|----|-------|------|-------|------|--------|--------|-------|------------|------------|--------|------|--|--|--|--|--|--|--|
| BLANK_11_28_17 | NA | 7.61  | 0.08 | 28.64 | 0.33 | 0.0442 | 0.0016 | -24.7 | 5.0742E-14 | 1.8893E-15 | 72762  | 2835 |  |  |  |  |  |  |  |
| BLANK_11-1-18  | NA | 8.84  | 0.09 | 30.32 | 0.35 | 0.0443 | 0.0024 | -19.1 | 5.1435E-14 | 2.7865E-15 | 78139  | 4303 |  |  |  |  |  |  |  |
| BLANK_5_13_19  | NA | 7.76  | 0.09 | 24.14 | 0.28 | 0.0616 | 0.0015 | -25.3 | 7.0616E-14 | 1.7195E-15 | 85328  | 2334 |  |  |  |  |  |  |  |
| BLANK_6_11_19  | NA | 9.22  | 0.11 | 25.52 | 0.29 | 0.1192 | 0.0020 | -25.0 | 1.3673E-13 | 2.2941E-15 | 174813 | 3582 |  |  |  |  |  |  |  |
| BLANK_9_10_19  | NA | 10.68 | 0.12 | 24.57 | 0.28 | 0.0631 | 0.0016 | -31.2 | 7.1467E-14 | 1.8122E-15 | 88148  | 2480 |  |  |  |  |  |  |  |
| BLANK_3_2_20   | NA | 8.34  | 0.09 | 24.00 | 0.30 | 0.0752 | 0.0017 | -21.8 | 8.6812E-14 | 1.9625E-15 | 104464 | 2699 |  |  |  |  |  |  |  |

BLANK\_11\_28\_17 was originally reported in Lamp et al (2019). All measurements were made at CEREGE.

Table S6c. *In situ* <sup>14</sup>C CRONUS-A extraction details - CEREGE

|                            |        |       |      |       |      |        |        |       |            |            |               |             |  |  |  |  |  |  |  |
|----------------------------|--------|-------|------|-------|------|--------|--------|-------|------------|------------|---------------|-------------|--|--|--|--|--|--|--|
| CRONUSA_8_28_17            | 3.6111 | 27.14 | 0.31 | 45.11 | 0.52 | 0.9366 | 0.0073 | -20.7 | 1.0841E-12 | 8.5048E-15 | 656388        | 9622        |  |  |  |  |  |  |  |
| CRONUSA_5_13_19            | 3.5869 | 30.27 | 0.35 | 50.02 | 0.59 | 0.8503 | 0.0064 | -19.5 | 9.8632E-13 | 7.4238E-15 | 666743        | 9956        |  |  |  |  |  |  |  |
| CRONUSA_6_13_19            | 3.6944 | 30.27 | 0.35 | 30.27 | 0.35 | 1.4549 | 0.0064 | -22.7 | 1.6767E-12 | 7.3757E-15 | 667536        | 7705        |  |  |  |  |  |  |  |
| CRONUSA_9_12_19            | 3.5044 | 28.84 | 0.33 | 28.84 | 0.33 | 1.4084 | 0.0115 | -21.1 | 1.6284E-12 | 1.3296E-14 | 647843        | 9101        |  |  |  |  |  |  |  |
| CRONUSA_1_30_20            | 3.5527 | 29.12 | 0.24 | 50.00 | 0.60 | 0.8565 | 0.0075 | -22.8 | 9.8675E-13 | 8.6406E-15 | 672150        | 10887       |  |  |  |  |  |  |  |
| <b>Mean ± 1 S.D. (n=5)</b> |        |       |      |       |      |        |        |       |            |            | <b>662132</b> | <b>9849</b> |  |  |  |  |  |  |  |

CRONUSA\_8\_2\_17 was originally reported in Lamp et al, 2019. All measurements were made at CEREGE.

**Table S7. Traditional  $^{14}\text{C}$  sample information for lakes in the KNS region**

| Lake Name          | Core ID   | Latitude ( $^{\circ}\text{N}$ ) | Longitude ( $^{\circ}\text{W}$ ) | Composite Depth (cm) | Lab number | Material dated          | Fraction modern | $\delta^{13}\text{C}$ (‰) | Radiocarbon Age ( $^{14}\text{C}$ yr BP) | Radiocarbon age uncertainty (yr) | Calibrated Age (cal yr BP) | Calibrated age uncertainty (2 $\sigma$ ; yr) |
|--------------------|-----------|---------------------------------|----------------------------------|----------------------|------------|-------------------------|-----------------|---------------------------|------------------------------------------|----------------------------------|----------------------------|----------------------------------------------|
| Kap01              | 17KAP-A4  | 64.30819                        | 50.18853                         | 197.0-198.0          | OS-138397  | Aquatic macrofossils    | 0.3493          | -26.7                     | 8450                                     | 160                              | 9450                       | 440                                          |
| Goose Feather Lake | 17GOOF-A3 | 64.45324                        | 49.44373                         | 79.0-80.0            | OS-141199  | Aquatic macrofossils    | 0.8948          | -25.7                     | 895                                      | 20                               | 820                        | 90                                           |
|                    | 17GOOF-A4 | 64.45324                        | 49.44373                         | 198.5-199.5          | OS-141260  | Sediment organic carbon | 0.3945          | -23.8                     | 7470                                     | 35                               | 8280                       | 90                                           |
| Marshall Lake      | 17MAR-A2  | 64.46361                        | 49.43313                         | 8.0                  | OS-141261  | Aquatic macrofossils    | 0.9402          | -18.8                     | 495                                      | 20                               | 520                        | 20                                           |
|                    | 17MAR-C1  | 64.46361                        | 49.43313                         | 16.5-17.0            | OS-144352  | Aquatic macrofossils    | 0.8804          | -22.5                     | 1020                                     | 20                               | 940                        | 20                                           |
|                    | 17MAR-C1  | 64.46361                        | 49.43313                         | 48.0-49.0            | OS-144353  | Aquatic macrofossils    | 0.6541          | -25.9                     | 3410                                     | 20                               | 3690                       | 120                                          |
|                    | 17MAR-C1  | 64.46361                        | 49.43313                         | 83.5-84.0            | OS-144354  | Aquatic macrofossils    | 0.4550          | -27.4                     | 6330                                     | 30                               | 7240                       | 80                                           |
|                    | 17MAR-C1  | 64.46361                        | 49.43313                         | 104.5-105.5          | OS-137548  | Aquatic macrofossils    | 0.3770          | -27.3                     | 7840                                     | 150                              | 8720                       | 360                                          |

Radiocarbon ages are calibrated using CALIB 8.2 and the INTCAL20 dataset (Stuiver et al., 2020; Reimer et al., 2020).

All samples were measured at the National Ocean Sciences Accelerator Mass Spectrometry Facility (NOSAMS) at Woods Hole Oceanographic Institution.

Radiocarbon ages from Goose Feather Lake were previously reported in Lesnek et al (2020).

**Table S8.  $^{14}\text{C}/^{10}\text{Be}$  ratios**

| Sample   | $^{14}\text{C}$<br>concentration<br>(atoms/g);<br>from Table S6a | $^{14}\text{C}$<br>concentration<br>unc. (atoms/g);<br>from Table S6a | $^{10}\text{Be}$<br>concentration<br>(atoms $\text{g}^{-1}$ );<br>from Table S3 | $^{10}\text{Be}$ conc.<br>uncertainty<br>(atoms $\text{g}^{-1}$ );<br>from Table S3 | $^{14}\text{C}/^{10}\text{Be}$ | $^{14}\text{C}/^{10}\text{Be}$ unc. | Minimum sample-<br>specific detectable<br>burial (yrs) |
|----------|------------------------------------------------------------------|-----------------------------------------------------------------------|---------------------------------------------------------------------------------|-------------------------------------------------------------------------------------|--------------------------------|-------------------------------------|--------------------------------------------------------|
| 17GRO-08 | 189794                                                           | 8544                                                                  | 158742                                                                          | 4249                                                                                | NA                             | NA                                  | NA                                                     |
| 17GRO-09 | 184202                                                           | 8127                                                                  | 156733                                                                          | 4026                                                                                | NA                             | NA                                  | NA                                                     |
| 17GRO-10 | 172735                                                           | 7513                                                                  | 109163                                                                          | 2601                                                                                | NA                             | NA                                  | NA                                                     |
| 17GRO-11 | 166922                                                           | 8716                                                                  | 80569                                                                           | 1972                                                                                | 2.07                           | 0.11 (0.22)                         | 510                                                    |
| 17GRO-12 | 128534                                                           | 5886                                                                  | 184334                                                                          | 4058                                                                                | NA                             | NA                                  | NA                                                     |
| 17GRO-13 | 125901                                                           | 5872                                                                  | 117860                                                                          | 3111                                                                                | NA                             | NA                                  | NA                                                     |
| 17GRO-14 | 124587                                                           | 9594                                                                  | 154381                                                                          | 3062                                                                                | NA                             | NA                                  | NA                                                     |
| 17GRO-71 | 134483                                                           | 6084                                                                  | 54215                                                                           | 1302                                                                                | 2.48                           | 0.11 (0.22)                         | 520                                                    |
| 17GRO-72 | 109666                                                           | 5147                                                                  | 47598                                                                           | 1100                                                                                | 2.30                           | 0.11 (0.22)                         | 515                                                    |
| 17GRO-73 | 113122                                                           | 5254                                                                  | 46618                                                                           | 1106                                                                                | 2.43                           | 0.11 (0.22)                         | 515                                                    |
| 17GRO-74 | 105002                                                           | 10923                                                                 | 46234                                                                           | 1015                                                                                | 2.27                           | 0.24 (0.48)                         | 1150                                                   |
| 17GRO-75 | 109215                                                           | 5122                                                                  | 45588                                                                           | 1847                                                                                | 2.40                           | 0.11 (0.22)                         | 510                                                    |

Ratios are not reported for samples that have inherited Be-10, which results in artificially low ratios.

We report the 1-sigma ratio uncertainty; 2-sigma uncertainty is in parentheses.

Minimum detectable burial is calculated using the sample-specific 1-sigma ratio uncertainty. Using the average ratio precision of all measurements (5.7%), we calculate a minimum burial detection limit of 625 years.



**Table S9. Modeled erosion depths**

| Sample               | Measured <sup>10</sup> Be<br>concentration<br>(atoms g <sup>-1</sup> ) | Measured <sup>10</sup> Be<br>conc. unc.<br>(atoms g <sup>-1</sup> ) | Measured <sup>14</sup> C<br>concentration<br>(atoms g <sup>-1</sup> ) | Measured <sup>14</sup> C<br>conc. unc.<br>(atoms g <sup>-1</sup> ) | Years of<br>historical ice<br>cover | 10 ka total<br>erosion<br>depth- <sup>10</sup> Be<br>(cm) | 10 ka total<br>erosion<br>depth- <sup>14</sup> C<br>(cm) | 9 ka total<br>erosion<br>depth- <sup>10</sup> Be<br>(cm) | 9 ka total<br>erosion<br>depth- <sup>14</sup> C<br>(cm) | 8 ka total<br>erosion<br>depth- <sup>10</sup> Be<br>(cm) | 8 ka total<br>erosion<br>depth- <sup>14</sup> C<br>(cm) | 7.5 ka total<br>erosion<br>depth- <sup>10</sup> Be<br>(cm) | 7.5 ka total<br>erosion<br>depth- <sup>14</sup> C<br>(cm) |
|----------------------|------------------------------------------------------------------------|---------------------------------------------------------------------|-----------------------------------------------------------------------|--------------------------------------------------------------------|-------------------------------------|-----------------------------------------------------------|----------------------------------------------------------|----------------------------------------------------------|---------------------------------------------------------|----------------------------------------------------------|---------------------------------------------------------|------------------------------------------------------------|-----------------------------------------------------------|
| 17GRO-71             | 54215                                                                  | 1392                                                                | 134483                                                                | 6084                                                               | 275                                 | 23.1 ± 0.9                                                | 14.4 ± 3.3                                               | 16.7 ± 1.1                                               | 10.4 ± 3.1                                              | 9.5 ± 1.1                                                | 5.7 ± 3.1                                               | 5.6 ± 1.1                                                  | 3.0 ± 3.0                                                 |
| 17GRO-72             | 47598                                                                  | 1199                                                                | 109666                                                                | 5147                                                               | 245                                 | 23.2 ± 1.1                                                | 20.6 ± 3.4                                               | 16.7 ± 1.0                                               | 16.5 ± 3.4                                              | 9.5 ± 1.1                                                | 11.7 ± 3.4                                              | 5.6 ± 1.1                                                  | 8.9 ± 3.3                                                 |
| 17GRO-73             | 46618                                                                  | 1106                                                                | 113122                                                                | 5254                                                               | 245                                 | 24.3 ± 1.2                                                | 18.1 ± 3.4                                               | 17.8 ± 1.2                                               | 14.1 ± 3.4                                              | 10.6 ± 1.2                                               | 9.3 ± 3.4                                               | 6.6 ± 1.2                                                  | 6.6 ± 3.3                                                 |
| 17GRO-74             | 46234                                                                  | 1015                                                                | 105002                                                                | 10923                                                              | 245                                 | 26.2 ± 1.0                                                | 25.1 ± 8.1                                               | 19.8 ± 1.0                                               | 21.0 ± 8.1                                              | 12.6 ± 1.0                                               | 16.0 ± 8.1                                              | 8.7 ± 1.0                                                  | 13.3 ± 7.9                                                |
| 17GRO-75             | 45588                                                                  | 1847                                                                | 109215                                                                | 5122                                                               | 245                                 | 27.0 ± 2.3                                                | 22.1 ± 3.4                                               | 20.6 ± 2.3                                               | 18.0 ± 3.4                                              | 13.3 ± 2.3                                               | 13.2 ± 3.4                                              | 9.4 ± 2.3                                                  | 10.3 ± 3.5                                                |
| <b>Mean ± 1 S.D.</b> |                                                                        |                                                                     |                                                                       |                                                                    |                                     | <b>24.8 ± 1.8</b>                                         | <i>20.1 ± 4.1</i>                                        | <b>18.3 ± 1.8</b>                                        | <i>16.0 ± 4.0</i>                                       | <b>11.1 ± 1.8</b>                                        | <i>11.2 ± 3.9</i>                                       | <b>7.2 ± 1.8</b>                                           | <i>8.4 ± 3.9</i>                                          |
